# Supplementary material
Source: PubMed Central journal article supplement (PMC6003829)

## Legends to the Supplementary Figures.

**Supplementary Figure 1. Phenotypic characterization of human CD4 Th cells.** Flow cytometric analyses of the indicated primary Th cells (ND8) or Th lines (NIH001, Jurkat) stained with a panel of indicated antibodies or their isotype IgG control antibodies are shown as histogram plots. The data tabulated below indicates the Th subtype, i.e., effector, effector memory, naïve etc. based on the combination of cell receptor expression.

**Supplementary Figure 2. Experimental depletion of WAS expression in normal (WT) Th cells.** (A) For CRISPR/Cas9-mediated WAS KO: location of gRNA guides on the *WAS* gene showing primer pairs with the expected amplicon length. (B) representative gel images showing clones with PCR amplicon patterns that is consistent with no KO, partial KO, and complete KO of *WAS*. (C) Western blot sequentially reprobed with anti-WASp and  $\alpha$ -tubulin loading control antibodies, to demonstrate complete *WAS* KO clones lacking WASp expression. (D) DNA sequencing of complete *WAS* KO clone show the expected gene region deletion. (E) RNA-interference-mediated depletion of WASp expression by shRNA vector. Shown is the western blot image of WASp expression in the indicated primary Th cells.

**Supplementary Figure 3. RNaseH1 expression into WT and WKO Th1 cells.** Flow cytometry (dot plot) of NIH001-WT and -WKO Th1 lines transfected with RNaseH1-eGFP construct or its empty vector control is shown as pre-sort (transfection efficiency) and post sort (purity) in 3 independent experiments. "X" denotes post-sort sample not tested for purity. The location of the gated population is shown, which was sorted for down-stream assays.

**Supplementary Figure 4. R loop modulation in DRB-treated Th1 cells.** *Left*, confocal images of WT Th1 cells dual-labelled with S9.6 antibody and DAPI. The image shown is representative of n=100 cells in DRB 100uM for 2 h treatment condition. *Right*, statistics of

S9.6+ foci changes under the indicated DRB dose/duration conditions. The displayed data is from n=100-150 cells analyzed for each condition. p-value: ns= nonsignificant by Mann-Whitney nonparametric test.

**Supplementary Figure 5. R-loop and DNA damage load in WASp-deficient Th2-cells. (A)**

Box-and-whisker plots comparing the magnitude of R-loop (S9.6+ foci) and DSB load (comet assay) in Th1 and Th2 cells, WASp-sufficient (WT) and WASp-deficient (WKOWKD). The data is representative of analyzing 20-30 z-stack images of at least 100 cells each from 2-3 independent experiments. (B) shown are the indicated immunofluorescence images overlaid on the corresponding Nomarski (DIC) images for Th1 and Th2 cells. Right, plot showing the range of individual (single) S9.6+ foci size in Th1 and Th2 cells. \*\*\*\*p<0.0001, Mann-Whitney.

**Supplementary Figure 6. Reconstituting nuclear but not cytosolic compartment of WASp-deficient Th1-cells is necessary to normalize R-loop frequency.**

Change in R-loop frequency in WAS Th1 line stably-transfected with NLS-deleted ( $\Delta$ NLS) or NES-deleted ( $\Delta$ NES) WASp mutants. Note, reconstituting only the nuclear compartment with WASp is sufficient to normalize the R-loop frequency (left panel), but reconstituting only the cytosolic compartment does not change the R-loop frequency (right panel). Also shown is the ChIP enrichment profile of  $\gamma$ H2A.X. Note, the DNA damage as reported by  $\gamma$ H2A.X enrichment is reduced by reconstituting only the nuclear compartment of WASp-deficient Th1 cells. Data is from n=3, mean+SEM.

**Supplementary Figure 7. The magnitude of R-loop accumulation and DNA-damage at non-Th1 genes in WASp-deficient Th1 cells. (A)**

R loop frequency at the 3'-ends of the indicated Th1 and non-Th1 genes in WAS Th1 line (NIH002) untransfected (control) or transfected with wt-WASp or the indicated pathogenic mutant. (B) DNA damage frequency at the same cis-region in the same set of genes. Data is from n=3, mean+SEM.

## Supplementary file 1

### Antibodies and Reagents

| Antibody                                         | Product number | Company name       | Used for                                    |
|--------------------------------------------------|----------------|--------------------|---------------------------------------------|
| AF488 anti-mouse IgG                             | A21202         | Invitrogen         | IF, FACS                                    |
| AF488 anti-rabbit IgG                            | A21206         | Invitrogen         | FACS                                        |
| AF488 anti-mouse IgG                             | A16119         | ThermoFisher       | IF                                          |
| AF568 anti-rabbit IgG                            | A-11004        | ThermoFisher       | IF                                          |
| AF594 anti-rabbit IgG                            | A11012         | Invitrogen         | FACS                                        |
| AF594 anti-mouse IgG                             | A21203         | Invitrogen         | FACS                                        |
| AF647 anti-mouse IgG                             | A32728         | ThermoFisher       | IF                                          |
| Anti-CD28                                        | 302902         | BioLegend          | Cell culture                                |
| Anti-CD3                                         | 300402         | BioLegend          | Cell culture                                |
| Anti-IL-4                                        | 500815         | BioLegend          | Cell culture                                |
| anti-mouse IgG-HRP                               | sc-2055        | Santa Cruz         | WB                                          |
| anti-rabbit IgG-HRP                              | sc-2054        | Santa Cruz         | WB                                          |
| DNAPKcs                                          | Ab18192        | Abcam              | ChIP                                        |
| DNAPKcs                                          | sc-5282        | Santa Cruz         | WB                                          |
| DNA-RNA Hybrid (S9.6)                            | ENH001         | Kerafast           | DRIP, FACS, IF                              |
| Flag M2                                          | F1804          | Sigma              | IP, WB, ChIP                                |
| H2A                                              | ab13923        | Abcam              | FACS                                        |
| phospho-Histone H2A.X (Ser139)                   | 05-636         | Millipore          | FACS, ChIP                                  |
| p-Histone H2A.X (Ser 139)                        | sc-101696      | Santa Cruz         | WB, IF                                      |
| H2A.Z                                            | ab4174         | Abcam              | FACS                                        |
| Histone H3                                       | ab1791         | Abcam              | WB, ChIP, FACS                              |
| IgG                                              | sc-66931       | Santa Cruz         | Gel super-shift                             |
| LAMP1                                            | H4A3           | DSHB               | WB                                          |
| Normal Mouse IgG                                 | 12-371         | Upstate            | ChIP, FACS                                  |
| Rabbit Control IgG                               | Ab46540        | Abcam              | IP, ChIP, FACS                              |
| RNA pol II                                       | 05-623         | Millipore          | ChIP                                        |
| RNA pol II (Ser2)                                | Ab5095         | Abcam              | ChIP                                        |
| RNA pol II (Ser5)                                | Ab5131         | Abcam              | ChIP                                        |
|                                                  |                |                    |                                             |
| Reagent                                          | Product number | Company            | Used for                                    |
| $\alpha$ -Amanitin                               | A2263          | Sigma              | Transcription inhibitor                     |
| Alexa Fluor™ 568 Phalloidin                      | A12380         | ThermoFisher       | IF                                          |
| Amaya Cell line nucleofactor kitV                | NC9041615      | Fisher Scientific  | Cell transfection                           |
| Agarose, low gelling temperature                 | A0701          | Sigma-Aldrich      | Single-Cell Gel Electrophoresis Assay       |
| ChIP-IT Protein G Magnetic Beads                 | 101945         | Active Motif       | ChIP, IP                                    |
| CometSlide                                       | 4250-200-03    | Trevigen           | Single-Cell Gel Electrophoresis Assay       |
| Control CRISPR/Cas9 Plasmid                      | Sc-418922      | Santa Cruz         | Control for KOs                             |
| Cytochalasin D                                   | C8273          | Sigma              | Actin depolymerization                      |
| CytoFix/CytoPerm solutions                       | 554714         | BD Pharmingen      | For intracellular FACS                      |
| DAPI                                             | D3571          | Invitrogen         | IF                                          |
| DRB                                              | D1916          | Sigma              | Transcription inhibitor                     |
| Enzymatic shearing cocktail                      | 101197         | Active Motif       | ChIP                                        |
| Lysis Solution                                   | 4250-050-01    | Trevigen           | Single-Cell Gel Electrophoresis Assay       |
| High Capacity cDNA Reverse Transcription kit     | 4368813        | Applied Biosystems | cDNA synthesis                              |
| Latrunculin B                                    | L5288          | Sigma              | Actin depolymerization                      |
| Myc-DDK-tagged ORF clone of Homo sapiens WAS     | RC203457       | Origene            | Used as mammalian protein expression vector |
| NE-PER Nuclear & Cytoplasmic Extraction Reagents | 78835          | Pierce             | To extract nuclear and cytoplasmic proteins |

|                                                    |             |                    |                        |
|----------------------------------------------------|-------------|--------------------|------------------------|
| Perfecta qPCR SuperMix, LowROX™                    | 95052-500   | Quanta Biosciences | RT-PCR                 |
| Plasmid Transfection Medium                        | sc-108062   | Santa Cruz         | For transfection       |
| Proteinsae K stop solution                         | Part#101942 | Active Motif       | ChIP                   |
| QuickChange II Site-Directed Mutagenesis (SDM) kit | 200519      | Stratagene         | Site-Directed Mutation |

WB: Western Blot

IF: Immunofluorescence

ChIP: Chromatin Immunoprecipitation

IP: Immunoprecipitation

FACS: Fluorescence-activated cell sorting

RT-PCR: Real Time Polymerase Chain Reaction

DRIP: DNA-RNA Immunoprecipitation

*Supplementary file 2*

*RT-qPCR Primers and Probes for mature mRNA and nascent pre-mRNA estimation*

| Gene (AssayID)         | Exon Boundary | Chromosome location         |
|------------------------|---------------|-----------------------------|
| IFNG (Hs99999041_m1)   | Ex1-2         | Chr.12: 68154770 - 68159741 |
| IFNG (Hs00989290_g1)   | Ex2-3         | Chr.12: 68154770 - 68159741 |
| IFNG (Hs00174143_m1)   | Ex3-4         | Chr.12: 68154770 - 68159741 |
| TBX21 (Hs00203436_m1)  | Ex1-2         | Chr.17: 47733240 - 47746122 |
| TBX21 (Hs00894391_g1)  | Ex2-3         | Chr.17: 47733240 - 47746122 |
| TBX21 (Hs00894392_m1)  | Ex3-4         | Chr.17: 47733240 - 47746122 |
| TBX21 (Hs00894393_gH)  | Ex4-5         | Chr.17: 47733240 - 47746122 |
| TBX21 (Hs00894394_g1)  | Ex5-6         | Chr.17: 47733240 - 47746122 |
| TUBA1A (Hs04187782_g1) | Ex1-2         | Chr.12: 49127782 - 49131521 |

|        |          |                                        |
|--------|----------|----------------------------------------|
| TUBA1A | Ex2-3    | 5'-GGCTGTGTTTGTAGACTTGGA-3'            |
|        |          | 5'-CTCATCAGGCAAGGAAGAT-3'              |
|        |          | 5'-6FAM-TGATGAAGTTCGCACTGGCACCTA-3'    |
| TUBA1A | Ex3-4    | 5'-CAAGGAAGATGCTGCCAATAAC-3'           |
|        |          | 5'-GTCTTCAGGGCTTCTTGGTT-3'             |
|        |          | 5'-6FAM-GTCTTCAGGGCTTCTTGGTT-3'        |
| IFNG   | 5'-UTR   | 5'-GTTTCCGAGAGAATTAAGCCAAAG-3'         |
|        |          | 5'-CATCTGAAGATCAGCTATTAGAAGAGA-3'      |
|        |          | 5'-6FAM-TCAAGCTGATCAGGTCCAAAGGACT-3'   |
| IFNG   | Ex1-Int1 | 5'-TTTCAGCTCTGCATCGTTT-3'              |
|        |          | 5'-AGCAAGTCGATATTCAGTCATT-3'           |
|        |          | 5'-6FAM-ACATATGGGTCTTGGCAGTAACAGC-3'   |
| IFNG   | Ex2-Int2 | 5'-GGTCATTCAGATGTAGCGGATAA-3'          |
|        |          | 5'-CCATCAGAAAGCAAGCAACAG-3'            |
|        |          | 5'-6FAM-AGAGGTAAGCTGAATATTCCTTTGGCT-3' |
| IFNG   | Int2-Ex3 | 5'-TCCTCTGTTTGTGCTCTTTCC-3'            |
|        |          | 5'-CTTGATGGTCTCCACACTCTTT-3'           |
|        |          | 5'-6FAM-ATGCAGAGCCAAATTGTCTCCTTT-3'    |

|       |              |                                       |
|-------|--------------|---------------------------------------|
| IFNG  | Ex3-Int3     | 5'-AAAGAGTGTGGAGACCATCAAG-3'          |
|       |              | 5'-CAAGACCCTCGGCAATGAA-3'             |
|       |              | 5'-6FAM-AGCTGACTAATTATTCGGTGAGGCT-3'  |
| IFNG  | Int3-Ex4     | 5'-ACTGACCATCATGACATTAGCA-3'          |
|       |              | 5'-CAGTTCAGCCATCACTTGGA-3'            |
|       |              | 5'-6FAM-ACTGACTTGAATGTCCAACGCAAAGC-3' |
| IFNG  | Ex4-3'-UTR   | 5'-TCCAAGTGATGGCTGAACTG-3'            |
|       |              | 5'-CAAATATTGCAGGCAGGACAAC-3'          |
|       |              | 5'-6FAM-TCGAGGTCTGAAGAGCATCCCAGTA-3'  |
| IFNG  | 3'-UTR-polyA | 5'-GTCAGGTGACCCTGATGAAA-3'            |
|       |              | 5'-TTGGGTACAGTCACAGTTGTC-3'           |
|       |              | 5'-6FAM-TCAGGAGATTTTCATGCCTGGTGCT-3'  |
| TBX21 | Ex1-Int1     | 5'-TCCAAGTTTAATCAGCACCAGA-3'          |
|       |              | 5'-GACAATGCTTCTGACTCCGT-3'            |
|       |              | 5'-6FAM-ATCATCACCAAGCAGGGACGGT-3'     |
| TBX21 | Int1-Ex2     | 5'-TGTC AAGCTGGAGCTGATG-3'            |
|       |              | 5'-ACTACAGGATGTTTGTGGACG-3'           |
|       |              | 5'-6FAM-TCTCTCTTCTCTCCAGGCGGATGT-3'   |
| TBX21 | Ex2-Int2     | 5'-ATGTTTGTGGACGTGGTCTT-3'            |
|       |              | 5'-CTCTGTTTCGCTGGGACTG-3'             |
|       |              | 5'-6FAM-GCAAGTGGGTGCAGTGTGGAAAG-3'    |
| TBX21 | Int2-Ex3     | 5'-GCATGTCAAAGAGGTGAACTG-3'           |
|       |              | 5'-CATTTGGGAAACTAAAGCTCACA-3'         |
|       |              | 5'-6FAM-ACAGGAAACCGCCTGTACGTCC-3'     |
| TBX21 | Ex3-Int3     | 5'-GCGCCAGGAAGTTTCATTTG-3'            |
|       |              | 5'-AAAAGGTAGCCTCGCCCT-3'              |
|       |              | 5'-6FAM-GCGTCCAACAATGTGACCCAGGTA-3'   |
| TBX21 | Int3-Ex4     | 5'-AACCGTCTTGCTCTGTCTAC-3'            |

|        |          |                                       |
|--------|----------|---------------------------------------|
|        |          | 5'-CATATCGTTGAGGTGAACGACG-3'          |
|        |          | 5'-6FAM-ATGATTGTGCTCCAGTCCCTCCAT-3'   |
| TBX21  | Ex4-Int4 | 5'-GCTTCCAACACGCATATCTTTAC-3'         |
|        |          | 5'-CTTGGGAGGGATTTGAAA-3'              |
|        |          | 5'-6FAM-ATTGCCGTGACTGCCTACCAGAAT-3'   |
| TBX21  | Int4-Ex5 | 5'-GTCTTCCTTGGGAGGGATTTG-3'           |
|        |          | 5'-CAAAGGATTCCGGGAGAACTT-3'           |
|        |          | 5'-6FAM-CCCAGACTCAGGACTCAGGTGACT-3'   |
| TBX21  | Ex5-Int5 | 5'-AAGGATTCCGGGAGAACTTTG-3'           |
|        |          | 5'-CTGAGACACATCCTCTCCCT-3'            |
|        |          | 5'-6FAM-GGGTTCAACTCAGCTTTGGTCCCT-3'   |
| TBX21  | Int5-Ex6 | 5'-TCTGCTTGTGACCCGTTT-3'              |
|        |          | 5'-CTACCCAACCAGTATCCTGTTC-3'          |
|        |          | 5'-6FAM-GCCTGGACCCAAGTCAATTCCT-3'     |
| TUBA1A | Ex1-Int1 | 5'-CCTCCTAATCCCTAGCCACTA -3'          |
|        |          | 5'-CGTTTGGAGGGCGGAA -3'               |
|        |          | 5'-6FAM-TCCCGGCTGCTTTCAGGGAA -3'      |
| TUBA1A | Int1-Ex2 | 5'-GGCGACAGACCTTATCTCTAAA -3'         |
|        |          | 5'-ATCTCCATCCACGTTGGC -3'             |
|        |          | 5'-6FAM-TTTCCTTCCCGCAGCGTGAGT -3'     |
| TUBA1A | Ex2-Int2 | 5'-GGCTGTGTTTGTAGACTTGGAA -3'         |
|        |          | 5'-TCACTCACTCACTCCCTCC -3'            |
|        |          | 5'-6FAM-CCCACAGTCATTGGTGAGTTGACCT -3' |
| TUBA1A | Int2-Ex3 | 5'-CTTCTTGTCACTCACTC -3'              |
|        |          | 5'-CAAGGAAGATGCTGCCAATAA -3'          |
|        |          | 5'-6FAM-CGTCCTTCTCTCCCTCCTCCAGAT -3'  |
| TUBA1A | Ex3-Int3 | 5'-CTACACCATTGGCAAGGAGAT -3'          |
|        |          | 5'-TAGTTCAGTGCAAGTTGGG -3'            |
|        |          | 5'-6FAM-TCGCAAGCTGGTAAGCACCATATA -3'  |

|        |          |                                  |
|--------|----------|----------------------------------|
|        |          |                                  |
| TUBA1A | Int3-Ex4 | 5'-CCTGTGCTTACATCAGTGAGA -3'     |
|        |          | 5'-GTCTTCAGGGCTTCTTGGTT -3'      |
|        |          | 5'-6FAM-TACAGGCTGACCAGTGCACC -3' |

**e. RT-qPCR Primers and Probes for intron retention**

|                         |                |                                      |
|-------------------------|----------------|--------------------------------------|
| IFNG                    | Ex2-Int2       | 5'-AGATGTAGCGGATAATGGA ACTC -3'      |
|                         |                | 5'-GTTTGTGCTCTTTCCTTCCAAG -3'        |
|                         |                | 5'-6FAM-TCCTGTTGCTTGCTTTCTGATGGA -3' |
| TBX21                   | Ex4-Int3-Ex5   | 5'-CGTGACTGCCTACCAGAATG -3'          |
|                         |                | 5'-CTATTCCTTCTCTCTAGATTACTCAG -3'    |
|                         |                | 5'-6FAM-CGTGACTGCCTACCAGAATG -3'     |
| IL13<br>(Hs01124271_g1) | Ex2-Int2-Ex3-2 | Chr.5: 132658173 - 132661109         |

**f. RT-PCR Primers for intron retention and sequencing**

|        |                           |                              |
|--------|---------------------------|------------------------------|
| IFNG   | Ex2-Int2-Ex3<br>[Forward] | 5'-TGCAGGTCATTCAGATGTAGC -3' |
|        | Ex2-Int2-Ex3<br>[Reverse] | 5'-TGACCAGAGCATCCAAAAGA -3'  |
| TBX21  | Ex4-Int4-Ex5<br>[Forward] | 5'-GCTGCATATCGTTGAGGTGA -3'  |
|        | Ex4-Int4-Ex5<br>[Reverse] | 5'-CAAAGGATTCCGGGAGAACT -3'  |
| TUBA1A | Ex2-Int2-Ex3<br>[Forward] | 5'-CCGGGCTGTGTTTGTAGACT -3'  |
|        | Ex2-Int2-Ex3<br>[Reverse] | 5'-ACACCATGGCAAGGAGATC -3'   |
| IL13   | Ex2-Int2-Ex3<br>[Forward] | 5'-CAGCATGGTATGGAGCATCA -3'  |
|        | Ex2-Int2-Ex3<br>[Reverse] | 5'-GAAGACCCAGAGGATGCTGA -3'  |

**g. Site-directed mutagenesis primer sets for generating WASp- mutants**

| Primer       | Sequence                                 |
|--------------|------------------------------------------|
| T45M Forward | 5'- TGCTTGGACGAAAATGCTTGATGCTGGCCACTG-3' |
| T45M Reverse | 5'- CAGTGGCCAGCATCAAGCATTTTCGTCCAAGCA-3' |
| V75M Forward | 5'-GGGGCTGTGTGCTTCATGAAGGATAACCCCC-3'    |



|               |                                           |
|---------------|-------------------------------------------|
| V75M Reverse  | 5'-GGGGGTTATCCTTCATGAAGCACACAGCCCC-3'     |
| A236G Forward | 5'-AGAAGAAGATCAGCAAAGGTGATATTGGTGCACCC-3' |
| A236G Reverse | 5'-GGGTGCACCAATATCACCTTTGCTGATCTTCTTCT-3' |
| R477K Forward | 5'-CACGTGATGCAGAAGAAAAGCAGAGCCATCCAC-3'   |
| R477K Reverse | 5'-GTGGATGGCTCTGCTTTTCTTCTGCATCACGTG-3'   |

**h. RT-qPCR Primers and Probes for mRNA estimation**

| Gene (AssayID)          | Exon Boundary | Chromosome location         |
|-------------------------|---------------|-----------------------------|
| IFNG (Hs00989290_g1)    | Ex2-3         | Chr.12: 68548550 - 68553521 |
| TBX21 (Hs00894392_m1)   | Ex3-4         | Chr.17: 45810610 - 45823485 |
| IL12RB2 (Hs02558264_s1) | Ex16-16       | Chr.1: 67773047 - 67862583  |
| GAPDH (Hs00266705_g1)   | Ex2-3         | Chr.12: 6643657 - 6647536   |

**i. ChIP-qPCR Primers and Probes based on NCBI36/hg18(Mar. 2006)**

| Genes Names                          | Primer/Probes Sequence                                  |
|--------------------------------------|---------------------------------------------------------|
| <i>-1kbTSS IFNG</i><br>(1)           | 5'-GTTCAAGCCATTCTCCTGCCT-3'                             |
|                                      | 5'-AAATTAGCCAGGCATGGTGGT-3'                             |
|                                      | 5'-/56-FAM/CCTCCCTAG/ZEN/TAGCTGAGATTACAGGCA/3IABkFQ/-3' |
| <i>5'UTR-EXONI IFNG</i><br>(2)       | 5'-CGTAATCCTCAGGAGACTTCAA-3'                            |
|                                      | 5'-GATCTTTCTTCTTAATAGCTGATCTTC-3'                       |
|                                      | 5'-/56-FAM/AAATACCAG/ZEN/CAGCCAGAGGAGGTG/3IABkFQ/-3'    |
| <i>EXONI-INTRON1 IFNG</i><br>(3)     | 5'-TTCAGCTCTGCATCGTTT-3'                                |
|                                      | 5'-GCAAGTCGATATTCAGTCATTT-3'                            |
|                                      | 5'-/56-FAM/ACATATGGG/ZEN/TCCTGGCAGTAACAGC/3IABkFQ/-3'   |
| <i>Intron1a-intron1a IFNG</i><br>(4) | 5'-ACCTTCTGCTCAGTTTGTATAGAG-3'                          |
|                                      | 5'-CTGAATGAGTCCACCACA-3'                                |
|                                      | 5'-/56-FAM/AGATGGGCA/ZEN/TAATATGGGTATGAAGCA/3IABkFQ/-3' |
| <i>Intron1b-intron1b IFNG</i><br>(5) | 5'-GATTTCAACATTCTGCTTCTCTATC-3'                         |
|                                      | 5'-AAACATTCCTTAGCCAGAATCA-3'                            |
|                                      | 5'-/56-FAM/CGGAAGTTC/ZEN/GTTGCTCACTGGGAT/3IABkFQ/-3'    |
| <i>Intron1c-intron1c IFNG</i><br>(6) | 5'-CACACACACACACACAC-3'                                 |
|                                      | 5'-CATCTACTGTGCCTTCCTGTAG-3'                            |
|                                      | 5'-/56-FAM/ACACTCGCA/ZEN/CATGTTTGGAATCT/3IABkFQ/-3'     |

|                                    |                                                          |
|------------------------------------|----------------------------------------------------------|
| <i>Intron1c-exon2a IFNG</i><br>(7) | 5'-GGTCATTTCAGATGTAGCGGATAA-3'                           |
|                                    | 5'-CAGAAAGCAAGCAACAGGAAA-3'                              |
|                                    | 5'-/56-FAM/AGAGGTAAG/ZEN/CTGAATATTCCTTTGGCT/3IABkFQ/-3'  |
| <i>Intron2a-exon3 IFNG</i><br>(8)  | 5'-TCCTCTGTTTGTGCTCTTTCC-3'                              |
|                                    | 5'-TTTGGATGCTCTGGTCATCTTT-3'                             |
|                                    | 5'-/56-FAM/ATGCAGAGC/ZEN/CAAATTGTCTCCTTT/3IABkFQ/-3'     |
| <i>Exon4-3'UTR IFNG</i><br>(9)     | 5'-GTGTAAGTTCACAACACTTATGCTG-3'                          |
|                                    | 5'-TTTCCACAGCTAAGAAGACTCC-3'                             |
|                                    | 5'-/56-FAM/AGTGAGACC/ZEN/TGGAGTGAAAGAACTACCT/3IABkFQ/-3' |
| <i>+1.5KB3'UTR IFNG</i><br>(10)    | 5'-TCCCTCTCTGAGGTTGAT-3'                                 |
|                                    | 5'-GGATCTTCTCCCTGTCTCATTC-3'                             |
|                                    | 5'-/56-FAM/TGGCCAGAC/ZEN/TGTGAGACATGAAAGA/3IABkFQ/-3'    |
| <i>+6kb3'UTR IFNG</i><br>(11)      | 5'-AGGACAACACTAGAAGGGACTCA-3'                            |
|                                    | 5'-AGAAACAAAGGTCTGCTCTCC-3'                              |
|                                    | 5'-/56-FAM/AGCCCTCTC/ZEN/ACAGGAGTCCTGGTAA/3IABkFQ/-3'    |
| <i>+3kb3'UTR IFNG</i><br>(12)      | 5'-CTTATCATCATGGAGGGCAGAA-3'                             |
|                                    | 5'-CCTAAAGTCTCCAGAAGGAACAA-3'                            |
|                                    | 5'-/56-FAM/AAATCAAGG/ZEN/CATCGGCAGGGC/3IABkFQ/-3'        |
| <i>3'TBX21</i>                     | 5'-CTCCAGTCCCTCCATAAGTACCA-3'                            |
|                                    | 5'-CTCTCCGTCGTTACCTCAAC-3'                               |
|                                    | 5'-6FAM-CCCCGGCTGCATAT-3'                                |
| <i>3'IL12RB2</i>                   | 5'-GTGGTAGCTCATGCCTGTAATC-3'                             |
|                                    | 5'-CCATGTTAGCCAGAATGGTCTC-3'                             |
|                                    | 5'-/56-FAM/AGGCGGATC/Zen/ATGAGGTCAGGAGAT/3IABkFQ/-3'     |
| <i>3'RUNX3</i>                     | 5'-GATGTGTGGAAGGAGTCCAG-3'                               |
|                                    | 5'-CTGGGCAACAGCAGGAG-3'                                  |
|                                    | 5'-/56-FAM/CCGGTTTCT/Zen/AGGGCTATGCATGGA/3IABkFQ/-3'     |
| <i>3'TLR1</i>                      | 5'-GGATCCACTTGTTTCTTTGCTATAA-3'                          |
|                                    | 5'-ACTAGAACACACATCACTGAAGAA-3'                           |

|                  |                                                                |
|------------------|----------------------------------------------------------------|
|                  | 5'-/56-FAM/TCATGAAGT/Zen/CAAGGGAAGCACCTGT/3IABkFQ/-3'          |
| <i>3'IL10</i>    | 5'-CAACAGAAGCTTCCATTCCAAG-3'                                   |
|                  | 5'-CCAAGCCCAGAGACAAGATAA-3'                                    |
|                  | 5'-/56-FAM/ACCACGCTT/ZEN/TCTAGCTGTTGAGCT/3IABkFQ/-3'           |
| <i>3'FOXP3</i>   | 5'-GTCACAATCCTGTCCCTCAC-3'                                     |
|                  | 5'-GCTGTGCTTGTGTGTGATTG-3'                                     |
|                  | 5'-/56-FAM/AGCCTGCCT/ZEN/CAGTACACTCAAACA/3IABkFQ/-3'           |
| <i>3'IL17A</i>   | 5'-GTGCTGTCTTGCCCTACTT-3'                                      |
|                  | 5'-TGGAGTGAAGAGGAAGGTCT-3'                                     |
|                  | 5'-/56-FAM/ATATTCTCA/ZEN/GGCCACTCTGCAGGC/3IABkFQ/-3'           |
| <i>3'IL5</i>     | 5'TTTACTGCAGTGAGAATGAGG-3'                                     |
|                  | 5'-CTTTCTGGCAAAGTGTCAGTAT-3'                                   |
|                  | 5'-/56-FAM/ATTAAGGCC/ZEN/TGACTCTTTCTTGGC/3IABkFQ/-3'           |
| <i>3'SNRPN</i>   | 5'-GAGCAATTAAGTGTGAGGTACTG<br>-3'                              |
|                  | 5'-AATCAACTGCTTAATAGGCATCAC-3'                                 |
|                  | 5'-/56-FAM/TGATGAGAT/Zen/CTTAAGTTACTGTGGATGAGG/3IABkFQ/-<br>3' |
| <i>3' ZNF544</i> | 5'-GGAGGAGTTGCCATTACACTAC-3'                                   |
|                  | 5'-CTTGGCAAGATCCCATCCAT-3'                                     |
|                  | 5'-/56-FAM/AAGATTGGT/Zen/GGACGGGAATGCTGT/3IABkFQ/-3'           |





|                 |        |        |                                |   |           |            |       |       |             |                   |    |      |   |   |                 |   |          |             |             |      |     |     |
|-----------------|--------|--------|--------------------------------|---|-----------|------------|-------|-------|-------------|-------------------|----|------|---|---|-----------------|---|----------|-------------|-------------|------|-----|-----|
| HSLEGLTLEGGSAK  |        | Medium | CS(Carbamidonet NP100-150.raw  | 3 | 591.96265 | 1773.8739  | 2.58  | 48.97 | Unambiguous | Isoform Beta-1 of | 3  | 3.47 | 0 | 1 | Q02880-2        | 1 |          | 0           | 1.37336E-06 | 722  | MS2 | 60  |
| HYDYVDQVWGK     | High   |        | NP100-250.raw                  | 2 | 679.26017 | 1357.71396 | 1.45  | 46.53 | Unambiguous | Isoform Beta-1 of | 3  | 4.94 | 0 | 1 | Q02880-2        | 1 |          |             |             | 312  | MS2 | 22  |
| HYDYVDQVWGK     |        | High   | NP100-150.raw                  | 2 | 453.24943 | 1357.71396 | 1.22  | 42.87 | Unambiguous | Isoform Beta-1 of | 3  | 3.88 | 0 | 1 | Q02880-2        | 1 |          |             |             | 385  | MS2 | 44  |
| HYDYVDQVWGK     |        | High   | NP200-250.raw                  | 2 | 679.36328 | 1357.71396 | 6.04  | 43.21 | Unambiguous | Isoform Beta-1 of | 3  | 4.78 | 0 | 1 | Q02880-2        | 1 |          |             |             | 345  | MS2 | 22  |
| HYDYVDQVWGK     |        |        | NP200-250.raw                  | 3 | 453.24374 | 1357.71396 | 4.12  | 43.22 | Unambiguous | Isoform Beta-1 of | 3  | 3.79 | 0 | 1 | Q02880-2        | 1 |          |             |             | 363  | MS2 | 44  |
| IFDEELVNAADNK   | High   |        | NP100-150.raw                  | 2 | 731.38513 | 1461.76235 | 3.10  | 55.16 | Unambiguous | Isoform Beta-1 of | 8  | 3.99 | 0 | 2 | Q02880-2:P11388 | 1 | 0.000153 | 0.00043761  |             | 361  | MS2 | 24  |
| IFDEELVNAADNK   |        | High   | NP150-250.raw                  | 3 | 487.92593 | 1461.76235 | 3.27  | 55.25 | Unambiguous | Isoform Beta-1 of | 8  | 3.79 | 0 | 2 | Q02880-2:P11388 | 1 | 0        | 4.4581E-07  |             | 437  | MS2 | 48  |
| IFDEELVNAADNK   |        | High   | NP100-150.raw                  | 2 | 731.38489 | 1461.76235 | 2.76  | 57.65 | Unambiguous | Isoform Beta-1 of | 8  | 4.25 | 0 | 2 | Q02880-2:P11388 | 1 |          |             |             | 375  | MS2 | 24  |
| IFDEELVNAADNK   |        | High   | NP100-150.raw                  | 3 | 487.92542 | 1461.76235 | 2.21  | 57.77 | Unambiguous | Isoform Beta-1 of | 8  | 4.15 | 0 | 2 | Q02880-2:P11388 | 1 |          |             |             | 467  | MS2 | 48  |
| IFDEELVNAADNK   |        | High   | NP200-250.raw                  | 2 | 731.38617 | 1461.76235 | 4.52  | 57.87 | Unambiguous | Isoform Beta-1 of | 8  | 4.15 | 0 | 2 | Q02880-2:P11388 | 1 |          |             |             | 344  | MS2 | 24  |
| IFDEELVNAADNK   |        | Medium | NP200-250.raw                  | 3 | 487.92667 | 1461.76235 | 4.78  | 57.92 | Unambiguous | Isoform Beta-1 of | 8  | 3.41 | 0 | 2 | Q02880-2:P11388 | 1 |          |             |             | 418  | MS2 | 48  |
| IMN             | High   |        | NP100-150.raw                  | 2 | 487.92037 | 1461.76235 | 1.64  | 57.94 | Selected    | Isoform Beta-1 of | 12 | 1.32 | 0 | 2 | Q02880-2:P11388 | 1 |          |             |             | 103  | MS2 | 48  |
| IMmImTQQDQDQSHK | High   |        | M2(Oxidation): M-NP100-150.raw | 3 | 588.69425 | 1763.79819 | 2.40  | 29.97 | Unambiguous | Isoform Beta-1 of | 7  | 4.73 | 0 | 2 | Q02880-2:P11388 | 1 | 0.029567 | 0.3010378   |             | 1127 | MS2 | 56  |
| IMmImTQQDQDQSHK |        | High   | M2(Oxidation): M-NP100-150.raw | 3 | 588.69413 | 1763.79827 | 2.20  | 32.20 | Unambiguous | Isoform Beta-1 of | 7  | 4.34 | 0 | 2 | Q02880-2:P11388 | 1 |          |             |             | 1135 | MS2 | 56  |
| KEWLNTHNEDR     | High   |        | M8(Oxidation): NP100-250.raw   | 3 | 495.56495 | 1464.69880 | 4.64  | 46.09 | Unambiguous | Isoform Beta-1 of | 7  | 3.87 | 1 | 2 | Q02880-2:P11388 | 1 | 0        | 9.6166E-05  |             | 662  | MS2 | 40  |
| KEWLNTHNEDR     |        | High   | NP150-250.raw                  | 3 | 490.23584 | 1468.69297 | 2.70  | 55.79 | Unambiguous | Isoform Beta-1 of | 7  | 4.11 | 1 | 2 | Q02880-2:P11388 | 1 | 0        | 9.82995E-05 |             | 649  | MS2 | 40  |
| KSPSRLWK        | High   |        | NP100-250.raw                  | 3 | 320.84402 | 960.51752  | 2.68  | 34.48 | Unambiguous | Isoform Beta-1 of | 7  | 2.75 | 1 | 2 | Q02880-2:P11388 | 1 | 0.009094 | 0.1049212   |             | 329  | MS2 | 28  |
| KIETVQDLK       | High   |        | NP150-250.raw                  | 2 | 638.84711 | 1236.68994 | 2.80  | 45.03 | Unambiguous | Isoform Beta-1 of | 4  | 2.37 | 1 | 2 | Q02880-2        | 1 | 0.041685 | 0.4132991   |             | 220  | MS2 | 18  |
| KIETVQDLK       |        | Medium | NP200-250.raw                  | 3 | 412.90094 | 1236.68827 | 3.88  | 47.81 | Unambiguous | Isoform Beta-1 of | 4  | 3.25 | 1 | 2 | Q02880-2        | 1 |          |             |             | 223  | MS2 | 36  |
| LAQAAGALK       | High   |        | NP100-250.raw                  | 3 | 370.29929 | 1108.61332 | 2.10  | 23.79 | Unambiguous | Isoform Beta-1 of | 3  | 3.16 | 0 | 1 | Q02880-2        | 1 | 0.000188 | 0.001322709 |             | 236  | MS2 | 40  |
| LAQAAGALK       |        | High   | NP150-250.raw                  | 2 | 554.80981 | 1108.61235 | 1.23  | 23.84 | Unambiguous | Isoform Beta-1 of | 3  | 3.07 | 0 | 1 | Q02880-2        | 1 | 0.000153 | 0.000446094 |             | 244  | MS2 | 20  |
| LAQAAGALK       |        | High   | NP100-150.raw                  | 2 | 554.81061 | 1108.61394 | 2.66  | 25.98 | Unambiguous | Isoform Beta-1 of | 3  | 4.01 | 0 | 1 | Q02880-2        | 1 |          |             |             | 229  | MS2 | 20  |
| LNnPTK          | High   |        | NP150-250.raw                  | 2 | 491.75644 | 982.50560  | 2.99  | 44.41 | Unambiguous | Isoform Beta-1 of | 7  | 2.73 | 0 | 2 | Q02880-2:P11388 | 1 | 0.00027  | 0.003062967 |             | 389  | MS2 | 14  |
| LKDQVALMTR      |        | Medium | NP100-150.raw                  | 3 | 425.57724 | 1274.71717 | 2.67  | 54.45 | Unambiguous | Isoform Beta-1 of | 3  | 3.63 | 1 | 1 | Q02880-2        | 1 |          |             |             | 178  | MS2 | 40  |
| LKDQVALMTR      |        | High   | NP200-250.raw                  | 3 | 425.57723 | 1274.72863 | 3.82  | 54.65 | Unambiguous | Isoform Beta-1 of | 3  | 3.65 | 1 | 1 | Q02880-2        | 1 |          |             |             | 180  | MS2 | 40  |
| LHGPEQLRYGTATK  | High   |        | NP150-250.raw                  | 3 | 558.96777 | 1674.88877 | 2.22  | 52.52 | Unambiguous | Isoform Beta-1 of | 3  | 2.98 | 0 | 1 | Q02880-2        | 1 | 0.000188 | 0.000885451 |             | 396  | MS2 | 56  |
| LIEVVK          | Medium |        | NP150-250.raw                  | 2 | 350.73497 | 700.46166  | 1.81  | 34.28 | Unambiguous | Cytochrome c oxii | 7  | 1.20 | 0 | 2 | H18R45:Q02880-  | 1 | 0.034639 | 0.3454588   |             | 97   | MS2 | 10  |
| LIEVVK          |        | Medium | NP100-250.raw                  | 2 | 350.73477 | 700.46227  | 2.68  | 41.30 | Selected    | Cytochrome c oxii | 7  | 1.49 | 0 | 2 | H18R45:Q02880-  | 1 | 0.015618 | 0.1641186   |             | 105  | MS2 | 10  |
| LLPFAVDNLLK     | High   |        | NP150-250.raw                  | 2 | 679.39264 | 1357.77800 | 3.94  | 65.93 | Unambiguous | Isoform Beta-1 of | 3  | 2.88 | 0 | 1 | Q02880-2        | 1 | 0.000188 | 0.00146149  |             | 142  | MS2 | 22  |
| LLPFAVDNLLK     |        | Medium | NP100-150.raw                  | 2 | 679.39209 | 1357.77890 | 3.13  | 68.26 | Unambiguous | Isoform Beta-1 of | 3  | 3.01 | 0 | 1 | Q02880-2        | 1 |          |             |             | 123  | MS2 | 22  |
| LLPFAVDNLLK     |        | Medium | NP200-250.raw                  | 2 | 679.39331 | 1357.77934 | 4.93  | 68.44 | Unambiguous | Isoform Beta-1 of | 3  | 2.75 | 0 | 1 | Q02880-2        | 1 |          |             |             | 137  | MS2 | 22  |
| LLPFAVDNLLK     |        | High   | NP100-150.raw                  | 4 | 572.78790 | 2288.12978 | 2.76  | 63.59 | Unambiguous | Isoform Beta-1 of | 3  | 4.30 | 2 | 1 | Q02880-2        | 1 |          |             |             | 1186 | MS2 | 102 |
| LLPFAVDNLLK     |        | High   | NP100-150.raw                  | 2 | 635.85522 | 1270.70317 | 2.34  | 50.03 | Unambiguous | Isoform Beta-1 of | 3  | 3.82 | 0 | 1 | Q02880-2        | 1 |          |             |             | 181  | MS2 | 20  |
| LLPFAVDNLLK     |        | High   | NP200-250.raw                  | 2 | 635.85522 | 1270.70337 | 4.07  | 50.09 | Unambiguous | Isoform Beta-1 of | 3  | 3.63 | 0 | 1 | Q02880-2        | 1 |          |             |             | 155  | MS2 | 20  |
| LLPFAVDNLLK     |        | High   | NP150-250.raw                  | 3 | 682.66888 | 2045.95210 | 3.20  | 65.18 | Unambiguous | Isoform Beta-1 of | 3  | 2.70 | 1 | 1 | Q02880-2        | 1 | 0.00027  | 0.002485287 |             | 1076 | MS2 | 60  |
| LLPFAVDNLLK     |        | High   | NP150-250.raw                  | 2 | 773.40283 | 1545.79839 | 2.71  | 46.83 | Unambiguous | Isoform Beta-1 of | 7  | 4.41 | 0 | 2 | Q02880-2:P11388 | 1 | 0        | 7.0743E-05  |             | 340  | MS2 | 24  |
| LLPFAVDNLLK     |        | High   | NP100-150.raw                  | 2 | 773.40240 | 1545.79753 | 2.16  | 49.33 | Unambiguous | Isoform Beta-1 of | 7  | 4.26 | 0 | 2 | Q02880-2:P11388 | 1 |          |             |             | 315  | MS2 | 24  |
| LLPFAVDNLLK     |        | High   | NP150-250.raw                  | 2 | 765.40552 | 1529.80376 | 2.93  | 51.92 | Unambiguous | Isoform Beta-1 of | 7  | 4.40 | 0 | 2 | Q02880-2:P11388 | 1 | 0        | 2.8749E-06  |             | 337  | MS2 | 24  |
| LLPFAVDNLLK     |        | High   | NP100-150.raw                  | 2 | 765.40515 | 1529.80303 | 2.45  | 54.46 | Unambiguous | Isoform Beta-1 of | 7  | 4.05 | 0 | 2 | Q02880-2:P11388 | 1 |          |             |             | 319  | MS2 | 24  |
| LLPFAVDNLLK     |        | High   | NP200-250.raw                  | 2 | 765.40222 | 1529.79717 | -1.38 | 54.60 | Unambiguous | Isoform Beta-1 of | 7  | 3.50 | 0 | 2 | Q02880-2:P11388 | 1 |          |             |             | 376  | MS2 | 24  |
| LLPFAVDNLLK     |        | High   | NP100-150.raw                  | 3 | 651.00110 | 1830.98094 | 1.41  | 52.14 | Unambiguous | Isoform Beta-1 of | 3  | 4.69 | 1 | 1 | Q02880-2        | 1 |          |             |             | 290  | MS2 | 60  |
| LLPFAVDNLLK     |        | High   | NP100-150.raw                  | 2 | 564.84167 | 1128.67607 | 2.19  | 54.36 | Unambiguous | Isoform Beta-1 of | 3  | 4.86 | 0 | 1 | Q02880-2        | 1 |          |             |             | 123  | MS2 | 22  |
| LLPFAVDNLLK     |        | High   | NP200-250.raw                  | 2 | 564.84253 | 1128.67778 | 3.70  | 54.67 | Unambiguous | Isoform Beta-1 of | 3  | 4.75 | 0 | 1 | Q02880-2        | 1 |          |             |             | 133  | MS2 | 22  |
| LLPFAVDNLLK     |        | High   | NP150-250.raw                  | 2 | 416.71481 | 832.42235  | 2.85  | 38.48 | Unambiguous | Isoform Beta-1 of | 7  | 2.40 | 0 | 2 | Q02880-2:P11388 | 1 | 0.001998 | 0.02812004  |             | 231  | MS2 | 12  |
| LLPFAVDNLLK     |        | Medium | NP150-250.raw                  | 2 | 926.43304 | 1851.85881 | 2.13  | 65.75 | Unambiguous | Isoform Beta-1 of | 3  | 5.62 | 0 | 1 | Q02880-2        | 1 | 0        | 3.24447E-07 |             | 1005 | MS2 | 30  |
| LLPFAVDNLLK     |        | Medium | NP100-150.raw                  | 3 | 617.95850 | 1851.86094 | 3.28  | 68.21 | Unambiguous | Isoform Beta-1 of | 3  | 3.64 | 0 | 1 | Q02880-2        | 1 |          |             |             | 1168 | MS2 | 60  |
| LLPFAVDNLLK     |        | High   | NP100-150.raw                  | 2 | 521.26617 | 2082.04287 | 1.84  | 43.75 | Unambiguous | Isoform Beta-1 of | 3  | 4.21 | 1 | 1 | Q02880-2        | 1 |          |             |             | 906  | MS2 | 102 |
| LLPFAVDNLLK     |        | High   | NP150-250.raw                  | 3 | 360.86502 | 1080.58051 | 0.77  | 24.11 | Unambiguous | Isoform Beta-1 of | 3  | 2.95 | 0 | 1 | Q02880-2        | 1 | 0.000188 | 0.0005673   |             | 289  | MS2 | 32  |
| LLPFAVDNLLK     |        | High   | NP200-250.raw                  | 2 | 926.43628 | 1851.86238 | 5.63  | 68.42 | Unambiguous | Isoform Beta-1 of | 3  | 3.50 | 0 | 1 | Q02880-2        | 1 | 0.026846 | 0.2786565   |             | 167  | MS2 | 12  |
| LLPFAVDNLLK     |        | High   | NP150-250.raw                  | 2 | 834.91272 | 1668.81816 | 3.92  | 56.07 | Unambiguous | Isoform Beta-1 of | 3  | 4.39 | 0 | 1 | Q02880-2        | 1 | 0        | 3.46867E-05 |             | 663  | MS2 | 30  |
| LLPFAVDNLLK     |        | High   | NP100-150.raw                  | 2 | 834.91168 | 1668.81609 | 2.68  | 58.51 | Unambiguous | Isoform Beta-1 of | 3  | 5.21 | 0 | 1 | Q02880-2        | 1 |          |             |             | 648  | MS2 | 30  |
| LLPFAVDNLLK     |        | High   | NP200-250.raw                  | 2 | 834.91358 | 1668.81988 | 4.95  | 58.76 | Unambiguous | Isoform Beta-1 of | 3  | 5.22 | 0 | 1 | Q02880-2        | 1 |          |             |             | 656  | MS2 | 30  |
| LLPFAVDNLLK     |        | High   | NP150-250.raw                  | 2 | 456.24405 | 851.48082  | 3.98  | 49.88 | Unambiguous | Isoform Beta-1 of | 7  | 2.31 | 0 | 2 | Q02880-2:P11388 | 1 | 0.001589 | 0.02026924  |             | 187  | MS2 | 12  |
| LLPFAVDNLLK     |        | High   | NP100-150.raw                  | 2 | 666.35730 | 1331.70732 | 3.37  | 61.71 | Unambiguous | Isoform Beta-1 of | 3  | 3.43 | 0 | 1 | Q02880-2        | 1 |          |             |             | 321  | MS2 | 20  |
| LLPFAVDNLLK     |        | High   |                                |   |           |            |       |       |             |                   |    |      |   |   |                 |   |          |             |             |      |     |     |

Human Jurkat Th1 cells: nuclear fraction ( 2 step IP with anti-Flag and -Myc Abs)

| P1187 | DNA topoisomerase 1 OS=Homo sapiens GN=TOP1 PE=1 SV=1 - [TOP2A_HUMAN] | 31.90 | B3 | 13 | 25 | D3 | 25 | E3 | 95 | F3 | 765 | G3 | 90.7 | H3 | Modifications | Spectrum File                       | Charge | m/z [Da]  | MH+ [Da]   | ΔPM [ppm] | RT [min] | PSM Ambiguity | Protein Description | # Proteins | XCorr | Missed Cleavage # | Protein Group/Stein Group | Accession | Engine Rank | q-Value     | PEP         | Peptides Matched | MS Order | Total Ions |  |
|-------|-----------------------------------------------------------------------|-------|----|----|----|----|----|----|----|----|-----|----|------|----|---------------|-------------------------------------|--------|-----------|------------|-----------|----------|---------------|---------------------|------------|-------|-------------------|---------------------------|-----------|-------------|-------------|-------------|------------------|----------|------------|--|
|       | Sequence                                                              | A3    |    |    |    |    |    |    |    |    |     |    |      |    |               |                                     |        |           |            |           |          |               |                     |            |       |                   |                           |           |             |             |             |                  |          |            |  |
|       | AEEVATFFAK                                                            |       |    |    |    |    |    |    |    |    |     |    |      |    |               | Koustat1.1.raw                      | 2      | 556.78809 | 1112.56890 | 5.92      | 45.48    | Unambiguous   | DNA topoisomerase 1 | 1          | 3.73  | 0                 | 1                         | P1187     | 1           | 0.00071099  | 347         | MS2              | 18       |            |  |
|       | AEEVATFFAK                                                            |       |    |    |    |    |    |    |    |    |     |    |      |    |               | Koustat1.1.raw                      | 2      | 556.78850 | 1112.56720 | 6.03      | 45.21    | Unambiguous   | DNA topoisomerase 1 | 1          | 3.75  | 0                 | 1                         | P1187     | 1           | 0.00105806  | 339         | MS2              | 18       |            |  |
|       | AEEVATFFAK                                                            |       |    |    |    |    |    |    |    |    |     |    |      |    |               | Koustat1.1.raw                      | 2      | 556.78818 | 1112.56920 | 6.07      | 45.12    | Unambiguous   | DNA topoisomerase 1 | 1          | 3.72  | 0                 | 1                         | P1187     | 1           | 0.0154077   | 375         | MS2              | 18       |            |  |
|       | AEEVATFFAK                                                            |       |    |    |    |    |    |    |    |    |     |    |      |    |               | Koustat1.1.raw                      | 2      | 556.78760 | 1112.56920 | 5.94      | 44.74    | Unambiguous   | DNA topoisomerase 1 | 1          | 3.14  | 0                 | 1                         | P1187     | 1           | 0.00083405  | 307         | MS2              | 18       |            |  |
|       | AEEVATFFAK                                                            |       |    |    |    |    |    |    |    |    |     |    |      |    |               | Koustat1.10.raw                     | 2      | 556.78772 | 1112.56816 | 5.26      | 45.03    | Unambiguous   | DNA topoisomerase 1 | 1          | 3.28  | 0                 | 1                         | P1187     | 1           | 0.00021748  | 391         | MS2              | 18       |            |  |
|       | AGNEKEEGTADTVGGSLSR                                                   |       |    |    |    |    |    |    |    |    |     |    |      |    |               | C10(Carbamidomethyl) Koustat1.2.raw | 3      | 728.11796 | 2182.9393  | 2.42      | 25.75    | Unambiguous   | DNA topoisomerase 1 | 1          | 6.61  | 1                 | 1                         | P1187     | 1           | 0.11239E-07 | 1904        | MS2              | 76       |            |  |
|       | AGNEKEEGTADTVGGSLSR                                                   |       |    |    |    |    |    |    |    |    |     |    |      |    |               | C10(Carbamidomethyl) Koustat1.2.raw | 3      | 728.11895 | 2182.94292 | 3.17      | 25.17    | Unambiguous   | DNA topoisomerase 1 | 1          | 5.81  | 1                 | 1                         | P1187     | 1           | 0.44137E-08 | 915         | MS2              | 76       |            |  |
|       | AGNEKEEGTADTVGGSLSR                                                   |       |    |    |    |    |    |    |    |    |     |    |      |    |               | C10(Carbamidomethyl) Koustat1.2.raw | 3      | 728.11781 | 2182.93888 | 2.21      | 25.47    | Unambiguous   | DNA topoisomerase 1 | 1          | 6.79  | 1                 | 1                         | P1187     | 1           | 0.81009E-09 | 1187        | MS2              | 76       |            |  |
|       | ANALYFDIK                                                             |       |    |    |    |    |    |    |    |    |     |    |      |    |               | Koustat1.4.raw                      | 2      | 520.29620 | 1039.5853  | 2.72      | 51.25    | Unambiguous   | DNA topoisomerase 1 | 1          | 4.40  | 0                 | 1                         | P1187     | 1           | 0.000911    | 0.02371258  | 119              | MS2      | 16         |  |
|       | ANALYFDIK                                                             |       |    |    |    |    |    |    |    |    |     |    |      |    |               | Koustat1.3.raw                      | 2      | 520.29218 | 1039.58708 | 4.60      | 50.82    | Unambiguous   | DNA topoisomerase 1 | 1          | 2.36  | 0                 | 1                         | P1187     | 1           | 0.008325    | 0.0667895   | 102              | MS2      | 16         |  |
|       | ANALYFDIK                                                             |       |    |    |    |    |    |    |    |    |     |    |      |    |               | Koustat1.6.raw                      | 2      | 520.29706 | 1039.58684 | 4.37      | 50.15    | Unambiguous   | DNA topoisomerase 1 | 1          | 2.57  | 0                 | 1                         | P1187     | 1           | 0.003308    | 0.06540293  | 118              | MS2      | 16         |  |
|       | ANALYFDIK                                                             |       |    |    |    |    |    |    |    |    |     |    |      |    |               | Koustat1.2.raw                      | 2      | 520.29700 | 1039.58672 | 4.25      | 50.55    | Unambiguous   | DNA topoisomerase 1 | 1          | 2.36  | 0                 | 1                         | P1187     | 1           | 0.017113    | 0.184966    | 116              | MS2      | 16         |  |
|       | ANALYFDIK                                                             |       |    |    |    |    |    |    |    |    |     |    |      |    |               | Koustat1.9.raw                      | 2      | 520.29694 | 1039.58660 | 4.13      | 50.25    | Unambiguous   | DNA topoisomerase 1 | 1          | 2.41  | 0                 | 1                         | P1187     | 1           | 0.003941    | 0.0386868   | 90               | MS2      | 16         |  |
|       | ANALYFDIK                                                             |       |    |    |    |    |    |    |    |    |     |    |      |    |               | Koustat1.0.raw                      | 2      | 520.29651 | 1039.58574 | 3.31      | 50.49    | Unambiguous   | DNA topoisomerase 1 | 1          | 2.61  | 0                 | 1                         | P1187     | 1           | 0.007102    | 0.08381958  | 112              | MS2      | 16         |  |
|       | cdFTIQSQYFK                                                           |       |    |    |    |    |    |    |    |    |     |    |      |    |               | C1(Carbamidomethyl) Koustat1.2.raw  | 2      | 735.80872 | 1470.61016 | 4.96      | 38.38    | Unambiguous   | DNA topoisomerase 1 | 1          | 4.11  | 0                 | 1                         | P1187     | 1           | 0.00088073  | 467         | MS2              | 20       |            |  |
|       | cdFTIQSQYFK                                                           |       |    |    |    |    |    |    |    |    |     |    |      |    |               | C1(Carbamidomethyl) Koustat1.0.raw  | 2      | 735.80869 | 1470.61211 | 6.29      | 37.58    | Unambiguous   | DNA topoisomerase 1 | 1          | 4.22  | 0                 | 1                         | P1187     | 1           | 4.0103E-06  | 508         | MS2              | 20       |            |  |
|       | cdFTIQSQYFK                                                           |       |    |    |    |    |    |    |    |    |     |    |      |    |               | C1(Carbamidomethyl) Koustat1.0.raw  | 2      | 735.80865 | 1470.61003 | 4.88      | 38.23    | Unambiguous   | DNA topoisomerase 1 | 1          | 4.41  | 0                 | 1                         | P1187     | 1           | 0.000133    | 0.000495193 | 466              | MS2      | 20         |  |
|       | DEDDADYFK                                                             |       |    |    |    |    |    |    |    |    |     |    |      |    |               | Koustat1.4.raw                      | 2      | 598.26239 | 1195.51790 | 5.11      | 14.15    | Unambiguous   | DNA topoisomerase 1 | 1          | 2.63  | 0                 | 1                         | P1187     | 1           | 0.000999    | 0.002927681 | 357              | MS2      | 18         |  |
|       | ELTAPDENPAK                                                           |       |    |    |    |    |    |    |    |    |     |    |      |    |               | Koustat1.2.raw                      | 2      | 649.33942 | 1297.67156 | 6.22      | 31.46    | Unambiguous   | DNA topoisomerase 1 | 1          | 3.20  | 0                 | 1                         | P1187     | 1           | 0.003346    | 0.01649453  | 275              | MS2      | 22         |  |
|       | ELTAPDENPAK                                                           |       |    |    |    |    |    |    |    |    |     |    |      |    |               | Koustat1.4.raw                      | 2      | 649.33807 | 1297.66887 | 4.15      | 30.42    | Unambiguous   | DNA topoisomerase 1 | 1          | 3.17  | 0                 | 1                         | P1187     | 1           | 0.000185    | 2.7247E-05  | 317              | MS2      | 22         |  |
|       | ELTAPDENPAK                                                           |       |    |    |    |    |    |    |    |    |     |    |      |    |               | Koustat1.3.raw                      | 2      | 649.33911 | 1297.66655 | 2.36      | 31.09    | Unambiguous   | DNA topoisomerase 1 | 1          | 2.97  | 0                 | 1                         | P1187     | 1           | 0.000969    | 0.01582824  | 349              | MS2      | 22         |  |
|       | ELTAPDENPAK                                                           |       |    |    |    |    |    |    |    |    |     |    |      |    |               | Koustat1.2.raw                      | 2      | 649.33917 | 1297.67107 | 5.84      | 30.47    | Unambiguous   | DNA topoisomerase 1 | 1          | 3.22  | 0                 | 1                         | P1187     | 1           | 0.000789    | 0.01679976  | 316              | MS2      | 22         |  |
|       | ELTAPDENPAK                                                           |       |    |    |    |    |    |    |    |    |     |    |      |    |               | Koustat1.2.raw                      | 2      | 649.33942 | 1297.67156 | 6.22      | 31.46    | Unambiguous   | DNA topoisomerase 1 | 1          | 3.20  | 0                 | 1                         | P1187     | 1           | 0.003346    | 0.01649453  | 275              | MS2      | 22         |  |
|       | ELTAPDENPAK                                                           |       |    |    |    |    |    |    |    |    |     |    |      |    |               | Koustat1.9.raw                      | 2      | 649.33942 | 1297.67156 | 6.22      | 31.46    | Unambiguous   | DNA topoisomerase 1 | 1          | 3.20  | 0                 | 1                         | P1187     | 1           | 0.003346    | 0.01649453  | 275              | MS2      | 22         |  |
|       | ELTAPDENPAK                                                           |       |    |    |    |    |    |    |    |    |     |    |      |    |               | Koustat1.0.raw                      | 2      | 649.33942 | 1297.67156 | 6.22      | 31.46    | Unambiguous   | DNA topoisomerase 1 | 1          | 3.20  | 0                 | 1                         | P1187     | 1           | 0.003346    | 0.01649453  | 275              | MS2      | 22         |  |
|       | ELTAPDENPAK                                                           |       |    |    |    |    |    |    |    |    |     |    |      |    |               | Koustat1.0.raw                      | 2      | 649.33942 | 1297.67156 | 6.22      | 31.46    | Unambiguous   | DNA topoisomerase 1 | 1          | 3.20  | 0                 | 1                         | P1187     | 1           | 0.003346    | 0.01649453  | 275              | MS2      | 22         |  |
|       | FAWAdmWDEDFEY                                                         |       |    |    |    |    |    |    |    |    |     |    |      |    |               | Koustat1.0.raw                      | 2      | 649.33942 | 1297.67156 | 6.22      | 31.46    | Unambiguous   | DNA topoisomerase 1 | 1          | 3.20  | 0                 | 1                         | P1187     | 1           | 0.003346    | 0.01649453  | 275              | MS2      | 22         |  |
|       | GPVAFPPFLPFLPK                                                        |       |    |    |    |    |    |    |    |    |     |    |      |    |               | Koustat1.3.raw                      | 2      | 877.46478 | 1753.92229 | 3.57      | 51.63    | Unambiguous   | DNA topoisomerase 1 | 1          | 3.28  | 0                 | 1                         | P1187     | 1           | 0.000136    | 0.00257263  | 347              | MS2      | 30         |  |
|       | GPVAFPPFLPFLPK                                                        |       |    |    |    |    |    |    |    |    |     |    |      |    |               | Koustat1.0.raw                      | 2      | 877.46622 | 1753.92522 | 5.24      | 51.23    | Unambiguous   | DNA topoisomerase 1 | 1          | 3.52  | 0                 | 1                         | P1187     | 1           | 0.01331471  | 303         | MS2              | 30       |            |  |
|       | GPVAFPPFLPFLPK                                                        |       |    |    |    |    |    |    |    |    |     |    |      |    |               | Koustat1.9.raw                      | 2      | 877.46621 | 1753.92515 | 5.20      | 51.23    | Unambiguous   | DNA topoisomerase 1 | 1          | 3.43  | 0                 | 1                         | P1187     | 1           | 0.00012006  | 0.359       | MS2              | 30       |            |  |
|       | GPVAFPPFLPFLPK                                                        |       |    |    |    |    |    |    |    |    |     |    |      |    |               | Koustat1.0.raw                      | 2      | 877.46515 | 1753.92302 | 3.99      | 51.19    | Unambiguous   | DNA topoisomerase 1 | 1          | 3.15  | 0                 | 1                         | P1187     | 1           | 0.00012006  | 0.359       | MS2              | 30       |            |  |
|       | HQLQMEGLTAK                                                           |       |    |    |    |    |    |    |    |    |     |    |      |    |               | Koustat1.0.raw                      | 2      | 678.35714 | 1355.70788 | 4.68      | 46.71    | Unambiguous   | DNA topoisomerase 1 | 1          | 4.45  | 0                 | 1                         | P1187     | 1           | 0.00078038  | 0.00011497  | 247              | MS2      | 22         |  |
|       | HQLQMEGLTAK                                                           |       |    |    |    |    |    |    |    |    |     |    |      |    |               | Koustat1.2.raw                      | 2      | 678.35724 | 1355.70517 | 4.68      | 46.71    | Unambiguous   | DNA topoisomerase 1 | 1          | 3.76  | 0                 | 1                         | P1187     | 1           | 0.000119891 | 371         | MS2              | 22       |            |  |
|       | HQLQMEGLTAK                                                           |       |    |    |    |    |    |    |    |    |     |    |      |    |               | Koustat1.9.raw                      | 2      | 678.35645 | 1355.70561 | 5.00      | 46.73    | Unambiguous   | DNA topoisomerase 1 | 1          | 3.71  | 0                 | 1                         | P1187     | 1           | 0.000119508 | 302         | MS2              | 22       |            |  |
|       | IMPEDIIISLK                                                           |       |    |    |    |    |    |    |    |    |     |    |      |    |               | M2(Oxidation): C1Koustat1.0.raw     | 2      | 724.86213 | 1448.71977 | 5.66      | 44.22    | Unambiguous   | DNA topoisomerase 1 | 1          | 2.63  | 0                 | 1                         | P1187     | 1           | 0.00011497  | 366         | MS2              | 22       |            |  |
|       | IMPEDIIISLK                                                           |       |    |    |    |    |    |    |    |    |     |    |      |    |               | M2(Oxidation): C1Koustat1.2.raw     | 2      | 724.86208 | 1448.72008 | 5.48      | 44.22    | Unambiguous   | DNA topoisomerase 1 | 1          | 3.41  | 0                 | 1                         | P1187     | 1           | 0.000465129 | 441         | MS2              | 22       |            |  |
|       | IMPEDIIISLK                                                           |       |    |    |    |    |    |    |    |    |     |    |      |    |               | M2(Oxidation): C1Koustat1.9.raw     | 2      | 724.86366 | 1448.72035 | 5.25      | 43.46    | Unambiguous   | DNA topoisomerase 1 | 1          | 3.24  | 0                 | 1                         | P1187     | 1           | 0.000118114 | 396         | MS2              | 22       |            |  |
|       | ITVAWIK                                                               |       |    |    |    |    |    |    |    |    |     |    |      |    |               | M2(Oxidation): C1Koustat1.0.raw     | 2      | 724.86366 | 1448.72035 | 5.25      | 43.46    | Unambiguous   | DNA topoisomerase 1 | 1          | 3.24  | 0                 | 1                         | P1187     | 1           | 0.000118114 | 396         | MS2              | 22       |            |  |
|       | ITVAWIK                                                               |       |    |    |    |    |    |    |    |    |     |    |      |    |               | M2(Oxidation): C1Koustat1.2.raw     | 2      | 724.86366 | 1448.72035 | 5.25      | 43.46    | Unambiguous   | DNA topoisomerase 1 | 1          | 3.24  | 0                 | 1                         | P1187     | 1           | 0.000118114 | 396         | MS2              | 22       |            |  |
|       | ITVAWIK                                                               |       |    |    |    |    |    |    |    |    |     |    |      |    |               | M2(Oxidation): C1Koustat1.9.raw     | 2      | 724.86366 | 1448.72035 | 5.25      | 43.46    | Unambiguous   | DNA topoisomerase 1 | 1          | 3.24  | 0                 | 1                         | P1187     | 1           | 0.000118114 | 396         | MS2              | 22       |            |  |
|       | ITVAWIK                                                               |       |    |    |    |    |    |    |    |    |     |    |      |    |               | M2(Oxidation): C1Koustat1.0.raw     | 2      | 439.23547 | 877.46367  | 4.10      | 36.63    |               |                     |            |       |                   |                           |           |             |             |             |                  |          |            |  |

|                   |  |  |  |  |        |               |               |           |            |            |       |             |                   |                   |      |      |   |                 |            |          |             |             |            |           |      |     |     |
|-------------------|--|--|--|--|--------|---------------|---------------|-----------|------------|------------|-------|-------------|-------------------|-------------------|------|------|---|-----------------|------------|----------|-------------|-------------|------------|-----------|------|-----|-----|
| DPALNSGVSQSPQAPAK |  |  |  |  | High   | Koustat10.raw | 3             | 541.95135 | 1623.8951  | 3.54       | 22.18 | Unambiguous | DNA topoisomerase | 4                 | 3.65 | 0    | 1 | P11388          | 1          | 0        | 0.000163673 | 503         | MS2        | 60        |      |     |     |
| DPALNSGVSQSPQAPAK |  |  |  |  | High   | Koustat10.raw | 2             | 812.2426  | 1623.8123  | 4.60       | 22.49 | Unambiguous | DNA topoisomerase | 4                 | 4.38 | 0    | 1 | P11388          | 1          | 0        | 0.00016648  | 291         | MS2        | 30        |      |     |     |
| ELALTTRELEAFKAF   |  |  |  |  | High   | Koustat10.raw | 3             | 602.97465 | 1623.9101  | 5.07       | 72.84 | Unambiguous | DNA topoisomerase | 7                 | 4.86 | 0    | 1 | P11388          | 1          | 0        | 1.8758E-05  | 606         | MS2        | 60        |      |     |     |
| EDVNR             |  |  |  |  | Medium | Koustat10.raw | 2             | 429.24744 | 857.48760  | 4.22       | 23.86 | Unambiguous | DNA topoisomerase | 4                 | 1.89 | 0    | 0 | 0.019623        | 0.238615   | 0.262    | MS2         | 12          | MS2        | 12        |      |     |     |
| EQKQZQVQLGK       |  |  |  |  | High   | Koustat10.raw | 3             | 443.2323  | 1327.6014  | 4.40       | 22.26 | Unambiguous | DNA topoisomerase | 4                 | 2.67 | 1    | 1 | P11388          | 1          | 0.00776  | 0.00329137  | 323         | MS2        | 44        |      |     |     |
| EQKQZQVQLGK       |  |  |  |  | High   | Koustat10.raw | 2             | 664.34930 | 1327.6013  | 4.55       | 22.32 | Unambiguous | DNA topoisomerase | 4                 | 4.4  | 1    | 1 | P11388          | 1          | 0.00001  | 0.00078905  | 360         | MS2        | 44        |      |     |     |
| EQKQZQVQLGK       |  |  |  |  | High   | Koustat10.raw | 3             | 443.23480 | 1327.68985 | 3.44       | 22.88 | Unambiguous | DNA topoisomerase | 4                 | 2.98 | 1    | 1 | P11388          | 1          | 0        | 0.00029208  | 360         | MS2        | 44        |      |     |     |
| ELLFNSNDR         |  |  |  |  | High   | Koustat11.raw | 2             | 718.8582  | 1436.70774 | 5.64       | 48.4  | Unambiguous | Isoform Beta-1 of | 7                 | 4.19 | 0    | 0 | 0.02880-2P11388 | 1          | 0        | 0.4944E-12  | 485         | MS2        | 22        |      |     |     |
| ELLFNSNDR         |  |  |  |  | High   | Koustat10.raw | 2             | 718.8582  | 1436.70774 | 6.06       | 48.4  | Unambiguous | Isoform Beta-1 of | 7                 | 4.08 | 0    | 0 | 0.02880-2P11388 | 1          | 0        | 0.3138E-05  | 445         | MS2        | 22        |      |     |     |
| ELLFNSNDR         |  |  |  |  | High   | Koustat10.raw | 3             | 479.57410 | 1436.70774 | 4.23       | 48.3  | Unambiguous | Isoform Beta-1 of | 7                 | 3.47 | 0    | 0 | 0.02880-2P11388 | 1          | 0        | 0.00036014  | 549         | MS2        | 44        |      |     |     |
| EMTTLQPK          |  |  |  |  | High   | Koustat10.raw | 2             | 480.74655 | 960.48833  | 4.04       | 23.3  | Selected    | Isoform Beta-1 of | 7                 | 1.74 | 0    | 0 | 0.02880-2P11388 | 1          | 0.003073 | 0.0452011   | 248         | MS2        | 14        |      |     |     |
| EQLELTLK          |  |  |  |  | High   | Koustat10.raw | 2             | 480.74655 | 960.48833  | 5.06       | 23.6  | Selected    | Isoform Beta-1 of | 7                 | 1.87 | 0    | 0 | 0.02880-2P11388 | 1          | 0.023427 | 0.2276727   | 294         | MS2        | 14        |      |     |     |
| EQLELTLK          |  |  |  |  | High   | Koustat10.raw | 2             | 488.25546 | 975.50365  | 4.70       | 26.11 | Unambiguous | DNA topoisomerase | 4                 | 1.70 | 0    | 0 | 0.02880-2P11388 | 1          | 0        | 0.002554    | 0.0531746   | 294        | MS2       | 14   |     |     |
| EQLELTLK          |  |  |  |  | High   | Koustat10.raw | 2             | 566.30591 | 1131.60454 | 3.59       | 22.90 | Unambiguous | DNA topoisomerase | 4                 | 2.19 | 1    | 1 | P11388          | 1          | 0.001201 | 0.0192252   | 497         | MS2        | 16        |      |     |     |
| EQVLFNTHGTR       |  |  |  |  | High   | Koustat10.raw | 2             | 752.3731  | 1503.7999  | 1.94       | 33.72 | Unambiguous | DNA topoisomerase | 4                 | 2.72 | 0    | 0 | 0.001123        | 0.00011673 | 543      | MS2         | 24          |            |           |      |     |     |
| EQVLFNTHGTR       |  |  |  |  | High   | Koustat10.raw | 2             | 744.7817  | 1487.7900  | 5.36       | 41.29 | Unambiguous | DNA topoisomerase | 4                 | 3.50 | 1    | 1 | P11388          | 1          | 0        | 0.13256E-05 | 208         | MS2        | 24        |      |     |     |
| EQVLFNTHGTR       |  |  |  |  | High   | Koustat15.raw | 2             | 576.8195  | 1152.6362  | 2.29       | 48.52 | Unambiguous | Isoform Beta-1 of | 8                 | 1.93 | 0    | 0 | 0.02880-2P11388 | 1          | 0.025379 | 0.2842081   | 191         | MS2        | 18        |      |     |     |
| EQVLFNTHGTR       |  |  |  |  | High   | Koustat12.raw | 2             | 576.81800 | 1152.62993 | -0.04      | 49.84 | Unambiguous | Isoform Beta-1 of | 8                 | 1.86 | 0    | 0 | 0.02880-2P11388 | 1          | 0.013775 | 0.2519483   | 177         | MS2        | 18        |      |     |     |
| EQVLFNTHGTR       |  |  |  |  | High   | Koustat10.raw | 2             | 576.81824 | 1152.62950 | -0.68      | 48.2  | Unambiguous | Isoform Beta-1 of | 8                 | 2.12 | 0    | 0 | 0.02880-2P11388 | 1          | 0.037075 | 0.3508853   | 184         | MS2        | 18        |      |     |     |
| EQVLFNTHGTR       |  |  |  |  | High   | Koustat10.raw | 2             | 710.86499 | 1402.72270 | 6.01       | 57.18 | Unambiguous | DNA topoisomerase | 4                 | 4.12 | 0    | 0 | 1               | P11388     | 1        | 0           | 0.42848E-06 | 299        | MS2       | 24   |     |     |
| EQVLFNTHGTR       |  |  |  |  | High   | Koustat10.raw | 2             | 702.80761 | 1404.72795 | 6.19       | 66.48 | Unambiguous | DNA topoisomerase | 4                 | 4.35 | 0    | 0 | 1               | P11388     | 1        | 0           | 5.74703E-06 | 260        | MS2       | 24   |     |     |
| EQVLFNTHGTR       |  |  |  |  | High   | Koustat10.raw | 3             | 468.3170  | 1404.72564 | 5.19       | 66.56 | Unambiguous | DNA topoisomerase | 4                 | 2.55 | 0    | 0 | 1               | P11388     | 1        | 0.0130708   | 0.1594313   | 366        | MS2       | 48   |     |     |
| EQVLFNTHGTR       |  |  |  |  | High   | Koustat10.raw | 2             | 678.80200 | 1356.59673 | 5.74       | 48.24 | Unambiguous | Isoform Beta-1 of | 7                 | 3.27 | 0    | 0 | 0.02880-2P11388 | 1          | 0        | 0.00014908  | 514         | MS2        | 18        |      |     |     |
| EQVLFNTHGTR       |  |  |  |  | High   | Koustat10.raw | 2             | 670.80497 | 1360.6246  | 6.29       | 59.36 | Unambiguous | Isoform Beta-1 of | 7                 | 2.95 | 0    | 0 | 0.02880-2P11388 | 1          | 0.002041 | 0.009012374 | 487         | MS2        | 18        |      |     |     |
| EQVLFNTHGTR       |  |  |  |  | High   | Koustat10.raw | 2             | 462.19133 | 919.39098  | 4.72       | 22.36 | Unambiguous | DNA topoisomerase | 4                 | 1.80 | 0    | 0 | 1               | P11388     | 1        | 0.007102    | 0.08348662  | 157        | MS2       | 12   |     |     |
| EQVLFNTHGTR       |  |  |  |  | High   | Koustat10.raw | 2             | 452.20010 | 903.29293  | 1.34       | 32.81 | Unambiguous | DNA topoisomerase | 4                 | 1.65 | 0    | 0 | 1               | P11388     | 1        | 0.013046    | 0.15835     | 295        | MS2       | 12   |     |     |
| EQVLFNTHGTR       |  |  |  |  | High   | Koustat11.raw | 2             | 668.3856  | 1335.76384 | 5.92       | 62.72 | Unambiguous | DNA topoisomerase | 4                 | 3.17 | 0    | 0 | 1               | P11388     | 1        | 0.005067    | 0.0055292   | 155        | MS2       | 20   |     |     |
| EQVLFNTHGTR       |  |  |  |  | High   | Koustat12.raw | 2             | 668.38800 | 1335.76387 | 5.98       | 61.2  | Unambiguous | DNA topoisomerase | 4                 | 3.81 | 0    | 0 | 1               | P11388     | 1        | 0.005005    | 0.01725714  | 119        | MS2       | 20   |     |     |
| EQVLFNTHGTR       |  |  |  |  | High   | Koustat9.raw  | 2             | 668.3823  | 1335.7618  | 6.93       | 61.63 | Unambiguous | DNA topoisomerase | 4                 | 3.78 | 0    | 0 | 1               | P11388     | 1        | 0.004283    | 0.04189776  | 150        | MS2       | 20   |     |     |
| EQVLFNTHGTR       |  |  |  |  | High   | Koustat10.raw | 2             | 668.3817  | 1335.76506 | 6.84       | 62.44 | Unambiguous | DNA topoisomerase | 4                 | 3.38 | 0    | 0 | 1               | P11388     | 1        | 0.001242    | 0.01897861  | 145        | MS2       | 20   |     |     |
| EQVLFNTHGTR       |  |  |  |  | High   | Koustat10.raw | 2             | 668.3817  | 1335.76421 | 6.84       | 62.44 | Unambiguous | DNA topoisomerase | 4                 | 3.68 | 0    | 0 | 1               | P11388     | 1        | 0.000546    | 0.006949006 | 136        | MS2       | 20   |     |     |
| EQVLFNTHGTR       |  |  |  |  | High   | Koustat9.raw  | 2             | 535.7519  | 1070.49590 | 5.34       | 29.22 | Unambiguous | Isoform Beta-1 of | 7                 | 1.93 | 0    | 0 | 0.02880-2P11388 | 1          | 0.044705 | 0.1748599   | 525         | MS2        | 14        |      |     |     |
| EQVLFNTHGTR       |  |  |  |  | High   | Koustat10.raw | 2             | 535.75067 | 1070.49496 | 3.63       | 29.17 | Unambiguous | Isoform Beta-1 of | 7                 | 2.26 | 0    | 0 | 0.02880-2P11388 | 1          | 0.008062 | 0.01301193  | 506         | MS2        | 14        |      |     |     |
| EQVLFNTHGTR       |  |  |  |  | High   | Koustat10.raw | 2             | 542.89246 | 1048.81782 | 4.63       | 24.47 | Unambiguous | DNA topoisomerase | 4                 | 2.64 | 1    | 1 | P11388          | 1          | 0.000520 | 0.008024514 | 264         | MS2        | 14        |      |     |     |
| EQVLFNTHGTR       |  |  |  |  | High   | Koustat11.raw | 2             | 455.73700 | 910.46672  | 4.19       | 23.41 | Unambiguous | DNA topoisomerase | 4                 | 2.05 | 0    | 0 | 1               | P11388     | 1        | 0.00317     | 0.02240768  | 391        | MS2       | 14   |     |     |
| EQVLFNTHGTR       |  |  |  |  | High   | Koustat9.raw  | 2             | 455.73715 | 910.46703  | 4.52       | 23.71 | Unambiguous | DNA topoisomerase | 4                 | 2.51 | 0    | 0 | 1               | P11388     | 1        | 0.002468    | 0.02780445  | 391        | MS2       | 14   |     |     |
| EQVLFNTHGTR       |  |  |  |  | High   | Koustat10.raw | 2             | 455.73630 | 910.46522  | 2.64       | 23.79 | Unambiguous | DNA topoisomerase | 4                 | 2.57 | 0    | 0 | 1               | P11388     | 1        | 0.001522    | 0.02358445  | 285        | MS2       | 14   |     |     |
| EQVLFNTHGTR       |  |  |  |  | High   | Koustat10.raw | 2             | 455.73630 | 910.46522  | 2.64       | 23.79 | Unambiguous | DNA topoisomerase | 4                 | 2.57 | 0    | 0 | 1               | P11388     | 1        | 0.001522    | 0.02358445  | 285        | MS2       | 14   |     |     |
| EQVLFNTHGTR       |  |  |  |  | High   | Koustat10.raw | 2             | 632.60358 | 1895.76118 | 5.07       | 46.48 | Unambiguous | DNA topoisomerase | 4                 | 2.37 | 0    | 0 | 1               | P11388     | 1        | 0           | 0.4701E-06  | 101        | MS2       | 64   |     |     |
| EQVLFNTHGTR       |  |  |  |  | High   | Koustat13.raw | 2             | 813.91195 | 1626.85661 | 4.89       | 52.90 | Unambiguous | DNA topoisomerase | 4                 | 4.89 | 1    | 1 | P11388          | 1          | 0        | 8.56509E-07 | 262         | MS2        | 28        |      |     |     |
| EQVLFNTHGTR       |  |  |  |  | High   | Koustat10.raw | 2             | 542.89246 | 1048.81782 | 4.60       | 52.07 | Unambiguous | DNA topoisomerase | 4                 | 4.60 | 0    | 0 | 1               | P11388     | 1        | 0           | 0.00000000  | 367        | MS2       | 56   |     |     |
| EQVLFNTHGTR       |  |  |  |  | High   | Koustat11.raw | 2             | 813.93372 | 1626.86106 | 7.06       | 53.11 | Unambiguous | DNA topoisomerase | 4                 | 2.87 | 0    | 0 | 1               | P11388     | 1        | 0.007461    | 0.08606581  | 309        | MS2       | 28   |     |     |
| EQVLFNTHGTR       |  |  |  |  | High   | Koustat10.raw | 2             | 813.93219 | 1626.86710 | 5.19       | 52.62 | Unambiguous | DNA topoisomerase | 4                 | 5.01 | 0    | 0 | 1               | P11388     | 1        | 0           | 1.74223E-05 | 274        | MS2       | 28   |     |     |
| EQVLFNTHGTR       |  |  |  |  | High   | Koustat10.raw | 2             | 542.89246 | 1048.81782 | 6.34       | 52.07 | Unambiguous | DNA topoisomerase | 4                 | 4.27 | 0    | 0 | 1               | P11388     | 1        | 0           | 7.7176E-07  | 366        | MS2       | 56   |     |     |
| EQVLFNTHGTR       |  |  |  |  | Medium | Koustat10.raw | 2             | 439.76016 | 878.51305  | 4.07       | 22.04 | Unambiguous | Isoform Beta-1 of | 8                 | 1.56 | 0    | 0 | 0.02880-2P11388 | 1          | 0.013197 | 0.1744991   | 156         | MS2        | 14        |      |     |     |
| EQVLFNTHGTR       |  |  |  |  | High   | S7(Phospho)   | Koustat10.raw | 2         | 428.77671  | 2794.11559 | 0.96  | 48.81       | Unambiguous       | DNA topoisomerase | 4    | 4.06 | 0 | 0               | 1          | P11388   | 2           | 0           | 0.00024004 | 2408      | MS2  | 148 |     |
| EQVLFNTHGTR       |  |  |  |  | High   | S8(Phospho)   | Koustat10.raw | 2         | 428.77671  | 2794.11559 | 0.96  | 48.81       | Unambiguous       | DNA topoisomerase | 4    | 4.06 | 0 | 0               | 1          | P11388   | 2           | 0           | 6.5729E-05 | 490       | MS2  | 148 |     |
| EQVLFNTHGTR       |  |  |  |  | High   | S9(Phospho)   | Koustat10.raw | 2         | 428.77671  | 2794.11559 | 0.96  | 48.81       | Unambiguous       | DNA topoisomerase | 4    | 4.06 | 0 | 0               | 1          | P11388   | 2           | 0           | 0.00018825 | 27407E-05 | 1086 | MS2 | 100 |
| EQVLFNTHGTR       |  |  |  |  | High   | S10(Phospho)  | Koustat10.raw | 2         | 428.77671  | 2794.11559 | 0.96  | 48.81       | Unambiguous       | DNA topoisomerase | 4    | 4.06 | 0 | 0               | 1          | P11388   | 2           | 0           | 0.00012000 | 9400E-05  | 2408 | MS2 | 148 |
| EQVLFNTHGTR       |  |  |  |  | High   | S11(Phospho)  | Koustat10.raw | 2         | 428.77671  | 2794.11559 | 0.96  | 48.81       | Unambiguous       | DNA topoisomerase | 4    | 4.06 | 0 | 0               | 1          | P11388   | 2           | 0           | 0.00012000 | 9400E-05  | 2408 | MS2 | 148 |
| EQVLFNTHGTR       |  |  |  |  | High   | S12(Phospho)  | Koustat10.raw | 2         | 428.77671  | 2794.11559 | 0.96  | 48.81       | Unambiguous       | D                 |      |      |   |                 |            |          |             |             |            |           |      |     |     |





|             |  |  |  |  |        |               |                      |               |           |            |            |       |             |                    |                    |      |      |                  |                  |            |             |            |      |     |     |
|-------------|--|--|--|--|--------|---------------|----------------------|---------------|-----------|------------|------------|-------|-------------|--------------------|--------------------|------|------|------------------|------------------|------------|-------------|------------|------|-----|-----|
| EDVAGmGSK   |  |  |  |  | Medium | M7(Oxidation) | Koustat10.rzw        | 2             | 511.74652 | 1022.48577 | 3.34       | 19.60 | Unambiguous | Isomform Beta-1 of | 3                  | 3.31 | 0    | 2 Q0280-2-B4DLVG | 1                | 0.016191   | 0.2051855   | 318        | MS2  | 18  |     |
| EDVAGmGSK   |  |  |  |  |        | High          | M7(Oxidation)        | Koustat10.rzw | 2         | 511.74689  | 1022.48580 | 4.05  | 20.21       | Unambiguous        | Isomform Beta-1 of | 3    | 3.51 | 0                | 2 Q0280-2-B4DLVG | 1          | 0.000133    | 0.00052604 | 247  | MS2 | 18  |
| EDVAGmGSK   |  |  |  |  |        | High          | Koustat16.rzw        | 2             | 503.74979 | 1006.42323 | 3.82       | 18.80 | Unambiguous | Isomform Beta-1 of | 3                  | 2.53 | 0    | 1 Q0280-2        | 1                | 0.000245   | 0.00083963  | 288        | MS2  | 12  |     |
| EDVNWV      |  |  |  |  | Medium |               | Koustat16.rzw        | 2             | 422.24094 | 843.47460  | 7.43       | 18.80 | Unambiguous | Isomform Beta-1 of | 3                  | 3.01 | 0    | 1 Q0280-2        | 1                | 0.041517   | 0.4178283   | 284        | MS2  | 12  |     |
| EDVNWV      |  |  |  |  |        | High          | Koustat12.rzw        | 2             | 422.24005 | 843.47283  | 5.33       | 18.60 | Unambiguous | Isomform Beta-1 of | 3                  | 2.18 | 0    | 1 Q0280-2        | 1                | 0.022856   | 0.2261099   | 285        | MS2  | 12  |     |
| EDVNWV      |  |  |  |  |        | High          | Koustat11.rzw        | 2             | 422.23935 | 843.47242  | 3.66       | 18.80 | Unambiguous | Isomform Beta-1 of | 3                  | 1.93 | 0    | 1 Q0280-2        | 1                | 0.06664    | 0.07019494  | 286        | MS2  | 12  |     |
| ELLUSNSDNER |  |  |  |  | High   |               | Koustat11.rzw        | 2             | 718.85852 | 1436.70976 | 5.64       | 48.42 | Unambiguous | Isomform Beta-1 of | 7                  | 4.19 | 0    | 2 Q0280-2-P11388 | 1                | 0          | 4.944612    | 485        | MS2  | 22  |     |
| ELLUSNSDNER |  |  |  |  |        | High          | Koustat10.rzw        | 2             | 718.85883 | 1436.71037 | 6.06       | 48.16 | Unambiguous | Isomform Beta-1 of | 7                  | 4.08 | 0    | 2 Q0280-2-P11388 | 1                | 0          | 1.13108E-05 | 245        | MS2  | 22  |     |
| ELLUSNSDNER |  |  |  |  |        | High          | Koustat10.rzw        | 2             | 479.12943 | 1436.71774 | 4.23       | 48.30 | Unambiguous | Isomform Beta-1 of | 7                  | 3.43 | 0    | 2 Q0280-2-P11388 | 1                | 0.00030414 | 0.3748599   | 525        | MS2  | 14  |     |
| EMHTLQPK    |  |  |  |  |        | High          | Koustat10.rzw        | 2             | 480.74655 | 960.48831  | 4.04       | 23.32 | Selected    | Isomform Beta-1 of | 7                  | 1.74 | 0    | 1 Q0280-2        | 1                | 0.000763   | 0.0452011   | 448        | MS2  | 14  |     |
| EMHTLQPK    |  |  |  |  |        | High          | Koustat10.rzw        | 2             | 480.74655 | 960.48831  | 4.04       | 23.32 | Selected    | Isomform Beta-1 of | 7                  | 1.74 | 0    | 1 Q0280-2        | 1                | 0.000763   | 0.0452011   | 448        | MS2  | 14  |     |
| EMHTLQPK    |  |  |  |  |        | High          | Koustat15.rzw        | 2             | 576.81995 | 1152.62622 | 2.29       | 48.20 | Unambiguous | Isomform Beta-1 of | 8                  | 1.93 | 0    | 2 Q0280-2-P11388 | 1                | 0.025379   | 0.2842081   | 184        | MS2  | 18  |     |
| EMHTLQPK    |  |  |  |  |        | High          | Koustat10.rzw        | 2             | 576.81995 | 1152.62623 | 2.04       | 48.20 | Unambiguous | Isomform Beta-1 of | 8                  | 1.96 | 0    | 2 Q0280-2-P11388 | 1                | 0.017175   | 0.3518463   | 177        | MS2  | 18  |     |
| EMHTLQPK    |  |  |  |  |        | High          | Koustat10.rzw        | 2             | 576.81824 | 1152.62920 | -0.68      | 49.04 | Unambiguous | Isomform Beta-1 of | 8                  | 2.12 | 0    | 1 Q030775        | 1                | 0.030775   | 0.3508553   | 191        | MS2  | 18  |     |
| EMHTLQPK    |  |  |  |  |        | High          | M7(Oxidation)        | Koustat10.rzw | 2         | 678.80200  | 1356.59673 | 5.74  | 48.20       | Unambiguous        | Isomform Beta-1 of | 7    | 3.27 | 0                | 2 Q0280-2-P11388 | 1          | 0           | 0.00014908 | 514  | MS2 | 18  |
| EMHTLQPK    |  |  |  |  |        | High          | Koustat10.rzw        | 2             | 678.80487 | 1360.62046 | 6.20       | 48.20 | Unambiguous | Isomform Beta-1 of | 7                  | 2.95 | 0    | 2 Q0280-2-P11388 | 1                | 0.00021    | 0.00012231  | 487        | MS2  | 18  |     |
| EMHTLQPK    |  |  |  |  |        | High          | M6(Oxidation)        | Koustat10.rzw | 2         | 718.80322  | 1436.71916 | 7.02  | 49.80       | Unambiguous        | Isomform Beta-1 of | 4    | 4.20 | 0                | 2 Q0280-2        | 1          | 0           | 2.9066E-05 | 386  | MS2 | 24  |
| EMHTLQPK    |  |  |  |  |        | High          | Koustat10.rzw        | 2             | 530.72638 | 1060.49458 | 4.73       | 35.94 | Unambiguous | Isomform Beta-1 of | 3                  | 2.26 | 0    | 1 Q0280-2        | 1                | 0.001522   | 0.0241999   | 330        | MS2  | 14  |     |
| EMHTLQPK    |  |  |  |  |        | High          | Koustat10.rzw        | 2             | 535.75139 | 1070.49599 | 5.24       | 39.21 | Unambiguous | Isomform Beta-1 of | 3                  | 1.83 | 0    | 2 Q0280-2-P11388 | 1                | 0.040705   | 0.3748599   | 525        | MS2  | 14  |     |
| EMHTLQPK    |  |  |  |  |        | High          | Koustat10.rzw        | 2             | 535.75967 | 1070.49606 | 3.63       | 29.17 | Unambiguous | Isomform Beta-1 of | 7                  | 2.20 | 0    | 2 Q0280-2-P11388 | 1                | 0.000662   | 0.01301193  | 506        | MS2  | 14  |     |
| EMHTLQPK    |  |  |  |  |        | High          | Koustat10.rzw        | 2             | 478.23315 | 955.45933  | 3.82       | 24.33 | Unambiguous | Isomform Beta-1 of | 3                  | 2.33 | 0    | 1 Q0280-2        | 1                | 0.030775   | 0.3502531   | 464        | MS2  | 14  |     |
| EMHTLQPK    |  |  |  |  |        | High          | C7(Carbamidomethyl)  | Koustat10.rzw | 2         | 445.25758  | 889.49428  | 1.90  | 21.30       | Unambiguous        | Isomform Beta-1 of | 3    | 2.63 | 0                | 2 Q0280-2-B4DLVG | 1          | 0.001739    | 0.0271622  | 271  | MS2 | 16  |
| EMHTLQPK    |  |  |  |  |        | High          | Koustat10.rzw        | 2             | 800.94073 | 1604.91919 | 6.02       | 53.44 | Unambiguous | Isomform Beta-1 of | 3                  | 5.50 | 0    | 1 Q0280-2        | 1                | 0          | 1.8623E-07  | 363        | MS2  | 28  |     |
| EMHTLQPK    |  |  |  |  |        | High          | Koustat13.rzw        | 2             | 547.62933 | 1048.87345 | 5.57       | 53.46 | Unambiguous | Isomform Beta-1 of | 3                  | 4.55 | 0    | 1 Q0280-2        | 1                | 0          | 1.5311E-06  | 347        | MS2  | 56  |     |
| EMHTLQPK    |  |  |  |  |        | High          | Koustat10.rzw        | 2             | 547.62915 | 1048.87290 | 5.23       | 53.25 | Unambiguous | Isomform Beta-1 of | 3                  | 4.52 | 0    | 1 Q0280-2        | 1                | 0          | 1.1294E-07  | 331        | MS2  | 56  |     |
| EMHTLQPK    |  |  |  |  |        | High          | Koustat10.rzw        | 2             | 820.94061 | 1604.91955 | 5.87       | 53.29 | Unambiguous | Isomform Beta-1 of | 3                  | 5.66 | 0    | 1 Q0280-2        | 1                | 0          | 8.4312E-06  | 363        | MS2  | 28  |     |
| EMHTLQPK    |  |  |  |  |        | High          | Koustat10.rzw        | 2             | 439.76016 | 878.51305  | 4.07       | 22.04 | Unambiguous | Isomform Beta-1 of | 8                  | 1.56 | 0    | 2 Q0280-2-P11388 | 1                | 0.01397    | 0.1744991   | 156        | MS2  | 14  |     |
| EMHTLQPK    |  |  |  |  |        | High          | Koustat11.rzw        | 2             | 808.41622 | 2423.23441 | 5.85       | 57.99 | Unambiguous | Isomform Beta-1 of | 8                  | 1.53 | 0    | 1 Q0280-2        | 1                | 0          | 3.8724E-16  | 113        | MS2  | 84  |     |
| EMHTLQPK    |  |  |  |  |        | High          | Koustat10.rzw        | 2             | 808.41381 | 2423.23688 | 2.74       | 56.93 | Unambiguous | Isomform Beta-1 of | 3                  | 7.11 | 0    | 1 Q0280-2        | 1                | 0          | 5.4665E-08  | 837        | MS2  | 84  |     |
| EMHTLQPK    |  |  |  |  |        | High          | Koustat10.rzw        | 2             | 447.71521 | 894.42114  | 3.10       | 17.93 | Unambiguous | Isomform Beta-1 of | 3                  | 2.32 | 0    | 1 Q0280-2        | 1                | 0.022235   | 0.2635889   | 166        | MS2  | 14  |     |
| EMHTLQPK    |  |  |  |  |        | High          | Koustat14.rzw        | 2             | 510.61948 | 1528.83888 | 4.94       | 64.04 | Unambiguous | Isomform Beta-1 of | 3                  | 3.94 | 0    | 1 Q0280-2        | 1                | 0          | 2.7426E-07  | 237        | MS2  | 48  |     |
| EMHTLQPK    |  |  |  |  |        | High          | Koustat10.rzw        | 2             | 510.61968 | 1528.84024 | 3.18       | 63.77 | Unambiguous | Isomform Beta-1 of | 3                  | 3.18 | 0    | 1 Q0280-2        | 1                | 0          | 0.00068694  | 241        | MS2  | 48  |     |
| EMHTLQPK    |  |  |  |  |        | High          | Koustat12.rzw        | 2             | 510.62015 | 1529.84889 | 6.26       | 64.16 | Unambiguous | Isomform Beta-1 of | 3                  | 3.55 | 0    | 1 Q0280-2        | 1                | 0          | 0.001594545 | 232        | MS2  | 48  |     |
| EMHTLQPK    |  |  |  |  |        | High          | Koustat10.rzw        | 2             | 510.61969 | 1528.84852 | 5.36       | 64.71 | Unambiguous | Isomform Beta-1 of | 3                  | 4.47 | 0    | 1 Q0280-2        | 1                | 0          | 1.1474E-07  | 234        | MS2  | 48  |     |
| EMHTLQPK    |  |  |  |  |        | High          | Koustat10.rzw        | 2             | 765.42607 | 1528.84977 | 4.53       | 64.66 | Unambiguous | Isomform Beta-1 of | 3                  | 4.19 | 0    | 1 Q0280-2        | 1                | 0          | 1.6707E-06  | 233        | MS2  | 24  |     |
| EMHTLQPK    |  |  |  |  |        | High          | Koustat10.rzw        | 2             | 510.61938 | 1529.84860 | 4.77       | 65.30 | Unambiguous | Isomform Beta-1 of | 3                  | 3.50 | 0    | 1 Q0280-2        | 1                | 0.000292   | 0.00321812  | 234        | MS2  | 48  |     |
| EMHTLQPK    |  |  |  |  |        | High          | C5(Carbamidomethyl)  | Koustat10.rzw | 2         | 591.96343  | 1173.87575 | 3.91  | 42.24       | Unambiguous        | Isomform Beta-1 of | 3    | 3.79 | 0                | 1 Q0280-2        | 1          | 0.000133    | 0.00037152 | 652  | MS2 | 60  |
| EMHTLQPK    |  |  |  |  |        | High          | Koustat13.rzw        | 2             | 679.36218 | 1357.71709 | 4.42       | 36.03 | Unambiguous | Isomform Beta-1 of | 3                  | 4.48 | 0    | 1 Q0280-2        | 1                | 0          | 2.3357E-06  | 279        | MS2  | 22  |     |
| EMHTLQPK    |  |  |  |  |        | High          | Koustat10.rzw        | 2             | 679.36218 | 1357.71709 | 4.42       | 36.03 | Unambiguous | Isomform Beta-1 of | 3                  | 4.48 | 0    | 1 Q0280-2        | 1                | 0          | 2.3357E-06  | 279        | MS2  | 22  |     |
| EMHTLQPK    |  |  |  |  |        | High          | Koustat10.rzw        | 2             | 679.36292 | 1357.71855 | 5.50       | 36.04 | Unambiguous | Isomform Beta-1 of | 3                  | 4.93 | 0    | 1 Q0280-2        | 1                | 0          | 2.3091E-05  | 289        | MS2  | 22  |     |
| EMHTLQPK    |  |  |  |  |        | High          | Koustat15.rzw        | 2             | 487.52691 | 1461.76518 | 5.28       | 51.03 | Unambiguous | Isomform Beta-1 of | 8                  | 3.72 | 0    | 2 Q0280-2-P11388 | 1                | 0          | 1.1048E-07  | 420        | MS2  | 48  |     |
| EMHTLQPK    |  |  |  |  |        | High          | Koustat10.rzw        | 2             | 731.38715 | 1461.76520 | 4.85       | 51.03 | Unambiguous | Isomform Beta-1 of | 8                  | 4.25 | 0    | 2 Q0280-2-P11388 | 1                | 0          | 6.9431E-09  | 349        | MS2  | 48  |     |
| EMHTLQPK    |  |  |  |  |        | High          | Koustat10.rzw        | 2             | 731.38593 | 1461.76457 | 4.18       | 51.37 | Unambiguous | Isomform Beta-1 of | 8                  | 3.29 | 0    | 2 Q0280-2-P11388 | 1                | 0          | 0.00020797  | 360        | MS2  | 48  |     |
| EMHTLQPK    |  |  |  |  |        | High          | Koustat13.rzw        | 2             | 487.52599 | 1461.76343 | 3.40       | 51.40 | Unambiguous | Isomform Beta-1 of | 8                  | 3.85 | 0    | 2 Q0280-2-P11388 | 1                | 0          | 1.0831E-07  | 427        | MS2  | 48  |     |
| EMHTLQPK    |  |  |  |  |        | High          | Koustat10.rzw        | 2             | 731.38713 | 1461.76378 | 4.10       | 51.38 | Unambiguous | Isomform Beta-1 of | 8                  | 4.10 | 0    | 2 Q0280-2-P11388 | 1                | 0          | 9.0661E-13  | 352        | MS2  | 48  |     |
| EMHTLQPK    |  |  |  |  |        | High          | Koustat10.rzw        | 2             | 487.52639 | 1461.76462 | 4.21       | 51.03 | Unambiguous | Isomform Beta-1 of | 8                  | 4.23 | 0    | 2 Q0280-2-P11388 | 1                | 0          | 2.3039E-08  | 424        | MS2  | 48  |     |
| EMHTLQPK    |  |  |  |  |        | High          | Koustat10.rzw        | 2             | 731.38690 | 1461.76453 | 5.52       | 51.9  | Unambiguous | Isomform Beta-1 of | 8                  | 3.85 | 0    | 2 Q0280-2-P11388 | 1                | 0.000292   | 0.002716907 | 341        | MS2  | 24  |     |
| EMHTLQPK    |  |  |  |  |        | High          | Koustat10.rzw        | 2             | 487.52648 | 1461.76490 | 4.40       | 51.17 | Unambiguous | Isomform Beta-1 of | 8                  | 3.88 | 0    | 2 Q0280-2-P11388 | 1                | 0          | 5.4522E-06  | 412        | MS2  | 48  |     |
| EMHTLQPK    |  |  |  |  |        | High          | M8(Oxidation)        | Koustat10.rzw | 2         | 516.29590  | 1031.58452 | 3.79  | 34.32       | Unambiguous        | Isomform Beta-1 of | 3    | 1.42 | 0                | 2 Q0280-2-B4DLVG | 1          | 0.003198    | 0.04100775 | 176  | MS2 | 16  |
| EMHTLQPK    |  |  |  |  |        | High          | C11(Carbamidomethyl) | Koustat10.rzw | 2         | 404.29199  | 2414.14644 | 5.29  | 46.65       | Unambiguous        | Isomform Beta-1 of | 3    | 3.71 | 0                | 1 Q0280-2        | 1          | 0           | 0.00023428 | 1778 | MS2 | 114 |
| EMHTLQPK    |  |  |  |  |        | High          | Koustat10.rzw        | 2             | 405.28617 | 2414.14395 | 4.38       | 46.57 | Unambiguous | Isomform Beta-1 of | 3                  | 3.26 | 0    | 1 Q0280-2        | 1                | 0          | 4.2013E-08  | 1859       | MS2  | 76  |     |
| EMHTL       |  |  |  |  |        |               |                      |               |           |            |            |       |             |                    |                    |      |      |                  |                  |            |             |            |      |     |     |

|                       |      |        |                               |   |           |            |      |       |             |                    |   |      |   |   |                 |   |          |             |     |     |    |
|-----------------------|------|--------|-------------------------------|---|-----------|------------|------|-------|-------------|--------------------|---|------|---|---|-----------------|---|----------|-------------|-----|-----|----|
| TPALSDYK              |      | High   | Koustav10.raw                 | 2 | 504.27603 | 1007.54479 | 3.94 | 34.95 | Unambiguous | Isomform Beta-1 of | 3 | 3.47 | 0 | 1 | Q02880-2        | 1 | 0.000241 | 0.001125244 | 224 | MS2 | 16 |
| TPALSDYHEHFDITVK      |      | High   | Koustav10.raw                 | 3 | 694.68793 | 2022.04923 | 4.90 | 37.65 | Unambiguous | Isomform Beta-1 of | 3 | 4.18 | 1 | 1 | Q02880-2        | 1 | 0        | 6.01871E-07 | 817 | MS2 | 68 |
| TVTQVYK               |      | High   | Koustav10.raw                 | 2 | 463.24455 | 925.48142  | 3.90 | 30.59 | Unambiguous | Isomform Beta-1 of | 3 | 2.02 | 0 | 1 | Q02880-2        | 1 | 0.014272 | 0.1752489   | 435 | MS2 | 12 |
| VHELANER              | High | Medium | Koustav16.raw                 | 3 | 360.86707 | 1080.58664 | 6.44 | 19.67 | Unambiguous | Isomform Beta-1 of | 3 | 2.96 | 0 | 1 | Q02880-2        | 1 | 0.000529 | 0.009874636 | 293 | MS2 | 32 |
| VHELANER              |      | High   | Koustav10.raw                 | 3 | 360.86624 | 1080.58417 | 4.15 | 19.37 | Unambiguous | Isomform Beta-1 of | 3 | 3.00 | 0 | 1 | Q02880-2        | 1 | 0        | 0.000120842 | 296 | MS2 | 32 |
| VHELANER              |      | High   | Koustav10.raw                 | 2 | 940.79523 | 1080.58318 | 3.24 | 19.41 | Unambiguous | Isomform Beta-1 of | 3 | 2.81 | 0 | 1 | Q02880-2        | 1 | 0.000292 | 0.001973292 | 277 | MS2 | 16 |
| VLFYGFK               |      | Medium | CS(Carbamidomet)Koustav10.raw | 2 | 457.74637 | 914.48546  | 5.45 | 45.53 | Unambiguous | Isomform Beta-1 of | 7 | 1.71 | 0 | 2 | Q02880-2-P11388 | 1 | 0.025164 | 0.2968945   | 155 | MS2 | 12 |
| VSDPESHSSHWNGK        |      | High   | Koustav10.raw                 | 2 | 943.49341 | 1885.97954 | 7.44 | 62.98 | Unambiguous | Isomform Beta-1 of | 3 | 5.45 | 0 | 1 | Q02880-2        | 1 | 0        | 1.4007E-07  | 356 | MS2 | 32 |
| VSDPESHSSHWNGK        |      | High   | Koustav10.raw                 | 3 | 629.33087 | 1885.97906 | 6.66 | 63.10 | Unambiguous | Isomform Beta-1 of | 3 | 4.39 | 0 | 1 | Q02880-2        | 1 | 0.000292 | 0.001459657 | 464 | MS2 | 64 |
| VYVPAFLGQLLTSNSYDDEKX |      | High   | Koustav10.raw                 | 3 | 872.45093 | 2615.33823 | 5.43 | 72.77 | Unambiguous | Isomform Beta-1 of | 3 | 1.84 | 1 | 1 | Q02880-2        | 1 | 0        | 4.78276E-06 | 567 | MS2 | 88 |
| YAGREDDAATLAFSK       |      | High   | Koustav11.raw                 | 2 | 834.91382 | 1668.82036 | 5.24 | 52.37 | Unambiguous | Isomform Beta-1 of | 3 | 3.50 | 0 | 1 | Q02880-2        | 1 | 0        | 5.3084E-08  | 615 | MS2 | 30 |
| YAGREDDAATLAFSK       | High | High   | Koustav10.raw                 | 2 | 834.91257 | 1668.81987 | 4.94 | 51.93 | Unambiguous | Isomform Beta-1 of | 3 | 6.04 | 0 | 1 | Q02880-2        | 1 | 0        | 1.1411E-07  | 611 | MS2 | 30 |
| YAGREDDAATLAFSK       |      | High   | Koustav10.raw                 | 3 | 556.94507 | 1668.82065 | 5.41 | 52.05 | Unambiguous | Isomform Beta-1 of | 3 | 3.79 | 0 | 1 | Q02880-2        | 1 | 0        | 5.88193E-05 | 810 | MS2 | 60 |
| YETVQDRK              |      | High   | Koustav10.raw                 | 2 | 554.80048 | 1108.59368 | 4.67 | 45.54 | Unambiguous | Isomform Beta-1 of | 4 | 3.03 | 0 | 1 | Q02880-2        | 1 | 0.000292 | 0.004304536 | 268 | MS2 | 16 |
| YGVFLR                |      | High   | Koustav10.raw                 | 2 | 426.24435 | 851.48143  | 4.70 | 45.56 | Unambiguous | Isomform Beta-1 of | 7 | 2.30 | 0 | 2 | Q02880-2-P11388 | 1 | 0.000506 | 0.01278071  | 185 | MS2 | 12 |
| YGVFLR                |      | High   | Koustav10.raw                 | 2 | 426.24411 | 851.48094  | 4.12 | 46.06 | Unambiguous | Isomform Beta-1 of | 7 | 2.28 | 0 | 1 | Q02880-2-P11388 | 1 | 0.001301 | 0.01525877  | 168 | MS2 | 12 |
| YIFMLSLAR             |      | High   | MS(Oxidation) Koustav10.raw   | 2 | 666.35846 | 1331.70964 | 5.11 | 55.37 | Unambiguous | Isomform Beta-1 of | 3 | 3.97 | 0 | 1 | Q02880-2        | 1 | 0        | 0.000285482 | 327 | MS2 | 20 |
| YIFMLSLAR             |      | High   | MS(Oxidation) Koustav10.raw   | 2 | 666.35894 | 1331.71001 | 5.39 | 55.94 | Unambiguous | Isomform Beta-1 of | 3 | 3.77 | 0 | 1 | Q02880-2        | 1 | 0        | 1.9688E-05  | 322 | MS2 | 20 |
| YIFMLSLAR             |      | High   | Koustav12.raw                 | 2 | 658.36267 | 1315.71807 | 7.71 | 66.25 | Unambiguous | Isomform Beta-1 of | 3 | 3.10 | 0 | 1 | Q02880-2        | 1 | 0.000905 | 0.01977624  | 292 | MS2 | 20 |
| YIFMLSLAR             |      | High   | Koustav10.raw                 | 2 | 658.36169 | 1315.71611 | 6.23 | 66.83 | Unambiguous | Isomform Beta-1 of | 3 | 3.51 | 0 | 1 | Q02880-2        | 1 | 0.000783 | 0.0164029   | 296 | MS2 | 20 |

| PCR Array Catalog #: | Qiagen    | PAHS-025Y |           |                                                                    |                                                                                           |
|----------------------|-----------|-----------|-----------|--------------------------------------------------------------------|-------------------------------------------------------------------------------------------|
| Position             | Unigene   | Refseq    | Symbol    | Description                                                        | Gname                                                                                     |
| A01                  | Hs.19383  | NM_00029  | AGT       | Angiotensinogen (serpin peptidase inhibitor, clade A)              | ANHU/SERPINA8                                                                             |
| A02                  | Hs.525622 | NM_005163 | AKT1      | V-akt murine thymoma viral oncogene homolog 1                      | AKT/CWS6/PKB/PKB-ALPHA/PRKBA/RAC/RAC-ALPHA                                                |
| A03                  | Hs.648565 | NM_005171 | ATF1      | Activating transcription factor 1                                  | EWS-ATF1/FUS/ATF-1/TREB36                                                                 |
| A04                  | Hs.227817 | NM_004049 | BCL2A1    | BCL2-related protein A1                                            | ACC-1/ACC-2/ACC1/ACC2/BCL2L5/BFL1/GRS/HBPA1                                               |
| A05                  | Hs.516966 | NM_138578 | BCL2L1    | BCL2-like 1                                                        | BCL-XL/SBCL2L/BCL-XL/BCLXL/BCLXS/Bcl-xL/PPP1R32/bcl-xL/bcl-xS                             |
| A06                  | Hs.31210  | NM_005178 | BCL3      | B-cell CLL lymphoma 3                                              | BCL4/D19S37                                                                               |
| A07                  | Hs.696238 | NM_001166 | BIRC2     | Baculoviral IAP repeat containing 2                                | API1/HIAP2/Hap-2/MIHB/RNF48/c-IAP1/cIAP1                                                  |
| A08                  | Hs.648101 | NM_032415 | CARD11    | Caspase recruitment domain family, member 11                       | BENTA/BIMP3/CARMA1/IMD11/PPBL                                                             |
| A09                  | Hs.2490   | NM_033292 | CASP1     | Caspase 1, apoptosis-related cysteine peptidase (h)                | ICE1/L1BC/P45                                                                             |
| A10                  | Hs.599762 | NM_001228 | CASP8     | Caspase 8, apoptosis-related cysteine peptidase                    | ALPS2B/CAP4/Casp-8/FLICE/MACH/MCH5                                                        |
| A11                  | Hs.303649 | NM_002982 | CCL2      | Chemokine (C-C motif) ligand 2                                     | GDCF-2/H11/HSMCR30/MCAF/MCP-1/MCP1/SCYA2/SMC-CF                                           |
| A12                  | Hs.514821 | NM_002985 | CCL5      | Chemokine (C-C motif) ligand 5                                     | D17S136E/RANTES/SCYA5/SIS-delta/SISd/TCP228/eoCP                                          |
| B01                  | Hs.472860 | NM_001250 | CD40      | CD40 molecule, TNF receptor superfamily member                     | Bp50/CDW40/TNFRSF5/p50                                                                    |
| B02                  | Hs.390736 | NM_003879 | CFLAR     | CASP8 and FADD-like apoptosis regulator                            | CASH/CASP8A1/CLARP/Casper/FLAME/FLAME-1/FLAME1/FLIP1/FLICE/MRIT/c-FLIP/c-FLIPL/c-FLIPR/c- |
| B03                  | Hs.198998 | NM_001276 | CHUK      | Conserved helix-loop-helix ubiquitous kinase                       | IKKKA/IKK-alpha/IKK1/IKKAVNFKBIA/TCF16                                                    |
| B04                  | Hs.173894 | NM_000757 | CSF1      | Colony stimulating factor 1 (macrophage)                           | CSF-1/MCSF                                                                                |
| B05                  | Hs.1349   | NM_000758 | CSF2      | Colony stimulating factor 2 (granulocyte-macrophage)               | GM-CSF                                                                                    |
| B06                  | Hs.2233   | NM_000759 | CSF3      | Colony stimulating factor 3 (granulocyte)                          | C17orf33/CSF3OS/GCSF                                                                      |
| B07                  | Hs.488293 | NM_005228 | EGFR      | Epidermal growth factor receptor                                   | ERBB/ERBB1/HER1/NISBD2/PIG6/1mENA                                                         |
| B08                  | Hs.326035 | NM_001964 | EGR1      | Early growth response 1                                            | AT225/G0S30/KROX-24/NGFI-A/TIS8/ZIF-268/ZNF225                                            |
| B09                  | Hs.181128 | NM_005229 | ELK1      | ELK1, member of ETS oncogene family                                | -                                                                                         |
| B10                  | Hs.86131  | NM_003824 | FADD      | Fas (TNFRSF6)-associated via death domain                          | GIG3/MORT1                                                                                |
| B11                  | Hs.2007   | NM_000639 | FASLG     | Fas ligand (TNF superfamily, member 6)                             | ALPS1B/APT1/LG1/APTL/CD178/CD95-L/CD95L/FASL/TNFSF6                                       |
| B12                  | Hs.25647  | NM_005252 | FOS       | FBJ murine osteosarcoma viral oncogene homolog                     | AP-1/C-FOS/p55                                                                            |
| C01                  | Hs.727017 | NM_002133 | HMOX1     | Heme oxygenase (decycling) 1                                       | HMOX1/DHCO-1/HSP32/hk286B10                                                               |
| C02                  | Hs.37026  | NM_024013 | IFNA1     | Interferon, alpha 1                                                | IFN/IFN-ALPHA/IFN-alpha/IFNA3/IFNA@                                                       |
| C03                  | Hs.856    | NM_000619 | IFNG      | Interferon, gamma                                                  | IFG/IFI                                                                                   |
| C04                  | Hs.597664 | NM_001566 | IKKB      | Inhibitor of kappa light polypeptide gene enhancer 1               | IKK-beta/IKK2/IKKB/IMD15/NFKBKB                                                           |
| C05                  | Hs.43505  | NM_003639 | IKBK      | Inhibitor of kappa light polypeptide gene enhancer 1               | AMCBX1/FIP-3/FIP3/Fip3p/IKK-gamma/IMD33/IP1P1/IP2/IPD2/NEMO/ZC2HC9                        |
| C06                  | Hs.193717 | NM_000572 | IL10      | Interleukin 10                                                     | CSIF/GVHDS/IL-10/IL10A/TGIF                                                               |
| C07                  | Hs.1722   | NM_000575 | IL1A      | Interleukin 1, alpha                                               | IL-1A/IL1/IL1-ALPHA/IL1F1                                                                 |
| C08                  | Hs.126256 | NM_000576 | IL1B      | Interleukin 1, beta                                                | IL-1B/IL1-BETA/IL1F2                                                                      |
| C09                  | Hs.701982 | NM_000877 | IL1R1     | Interleukin 1 receptor, type 1                                     | CD121A/D2S1473/IL-1R-alpha/IL1R/IL1RA/P80                                                 |
| C10                  | Hs.522819 | NM_001569 | IRAK1     | Interleukin-1 receptor-associated kinase 1                         | IRAK/pelle                                                                                |
| C11                  | Hs.449207 | NM_001570 | IRAK2     | Interleukin-1 receptor-associated kinase 2                         | IRAK2                                                                                     |
| C12                  | Hs.696684 | NM_002228 | JUN       | Jun proto-oncogene                                                 | AP-1/AP1/c-Jun                                                                            |
| D01                  | Hs.36     | NM_000595 | LTA       | Lymphotoxin alpha (TNF superfamily, member 1)                      | L7/TNFb/TNFSF1                                                                            |
| D02                  | Hs.1116   | NM_002342 | LTBR      | Lymphotoxin beta receptor (TNFR superfamily, member 1)             | CD18/D12S370/LT-BETA-R/TNF-R-III/TNFCR/TNFR-RP/TNFR2-RP/TNFR3/TNFRSF3                     |
| D03                  | Hs.601217 | NM_173844 | MALT1     | Mucosa associated lymphoid tissue lymphoma transmembrane protein 1 | IMD12/MLT/MLT1                                                                            |
| D04                  | Hs.653654 | NM_005921 | MAP3K1    | Mitogen-activated protein kinase kinase kinase 1                   | IMAPKK1/MEKK/MEKK1/MEKK1/SRXY6                                                            |
| D05                  | Hs.82116  | NM_002468 | MYD88     | Myeloid differentiation primary response gene (88)                 | MYD88D                                                                                    |
| D06                  | Hs.73090  | NM_002502 | NFKB2     | Nuclear factor of kappa light polypeptide gene enhancer 1          | CD101/H2TF1/LYT-10/LYT10/NF-kB2/p100/p52                                                  |
| D07                  | Hs.738731 | NM_006092 | NOD1      | Nucleotide-binding oligomerization domain containing               | CARD4/CLR7_1/NLRC1                                                                        |
| D08                  | Hs.658434 | NM_021444 | PSIP1     | PC4 and SFRS1 interacting protein 1                                | DF570/LEDGF/PAIP/PSIP2/p52/p75                                                            |
| D09                  | Hs.159130 | NM_002880 | RAF1      | V-raf-1 murine leukemia viral oncogene homolog 1                   | CMO1/NNCRAF/NSS/Raf-1/c-Raf                                                               |
| D10                  | Hs.633266 | NM_002908 | REL       | V-rel reticuloendotheliosis viral oncogene homolog                 | C-Rel                                                                                     |
| D11                  | Hs.502875 | NM_021975 | RELA      | V-rel reticuloendotheliosis viral oncogene homolog                 | NFKB3/p65                                                                                 |
| D12                  | Hs.654402 | NM_006509 | RELB      | V-rel reticuloendotheliosis viral oncogene homolog                 | IL-REL/IREL/REL-B                                                                         |
| E01                  | Hs.247077 | NM_001664 | RHOA      | Ras homolog gene family, member A                                  | ARH12/ARHARHO12/RHOH12                                                                    |
| E02                  | Hs.519842 | NM_003804 | RIPK1     | Receptor (TNFRSF)-interacting serine-threonine kinase              | RIP/RIP1                                                                                  |
| E03                  | Hs.642990 | NM_007315 | STAT1     | Signal transducer and activator of transcription 1, 9              | CANDF7/IMD31A/IMD31B/IMD31C/ISGF-3/STAT91                                                 |
| E04                  | Hs.505874 | NM_013254 | TBK1      | TANK-binding kinase 1                                              | NAK/T2K                                                                                   |
| E05                  | Hs.29344  | NM_182919 | TICAM1    | Toll-like receptor adaptor molecule 1                              | IAE6/MvD88-3/PRV1TRB/TICAM-1/TRIF                                                         |
| E06                  | Hs.522832 | NM_003254 | TIMP1     | TIMP metalloproteinase inhibitor 1                                 | CLG/IEP/AE/POHC/TIMP                                                                      |
| E07                  | Hs.654532 | NM_003263 | TLR1      | Toll-like receptor 1                                               | CD281/TL1L1_LPRS5/rsc786                                                                  |
| E08                  | Hs.519033 | NM_003264 | TLR2      | Toll-like receptor 2                                               | CD282/TL4                                                                                 |
| E09                  | Hs.657724 | NM_003265 | TLR3      | Toll-like receptor 3                                               | CD283/IAE2                                                                                |
| E10                  | Hs.174312 | NM_138554 | TLR4      | Toll-like receptor 4                                               | ARMOD1/CD284/TLR-4/TOLL                                                                   |
| E11                  | Hs.575090 | NM_006068 | TLR6      | Toll-like receptor 6                                               | CD286                                                                                     |
| E12                  | Hs.87968  | NM_017442 | TLR9      | Toll-like receptor 9                                               | CD289                                                                                     |
| F01                  | Hs.591834 | NM_003844 | TNFRSF10A | Tumor necrosis factor receptor superfamily, member 10              | AP02/CD261/DR4/TRAILR-1/TRAILR1                                                           |
| F02                  | Hs.661668 | NM_003842 | TNFRSF10B | Tumor necrosis factor receptor superfamily, member 10              | CD262/DR5/KILLER/DR5/TRAILR-2/TRAILR2/TRICK2/TRICK2A/TRICK2B/TRICK2B/ZNFR9                |
| F03                  | Hs.713833 | NM_001065 | TNFRSF1A  | Tumor necrosis factor receptor superfamily, member 1               | CD120a/FFP/MSS/TBP1/TNF-R/TNF-R-ITNF-R55/TNFAR/TNFR1/TNFR1-d2/TNFR55/TNFR60/p55/p55-R55   |
| F04                  | Hs.478275 | NM_003810 | TNFSF10   | Tumor necrosis factor (ligand) superfamily, member 10              | AP02L/Apo-2L/CD253/TL2/TRAIL                                                              |
| F05                  | Hs.460996 | NM_003789 | TRADD     | TNFRSF1A-associated via death domain                               | Hs.89892                                                                                  |
| F06                  | Hs.522506 | NM_021138 | TRAF2     | TNF receptor-associated factor 2                                   | MGC45012/TRAP/TRAP3                                                                       |
| F07                  | Hs.510528 | NM_003300 | TRAF3     | TNF receptor-associated factor 3                                   | CAP-1/CAP1/CD40bp/CRAF1/IAE5/LAP1                                                         |
| F08                  | Hs.591983 | NM_004620 | TRAF6     | TNF receptor-associated factor 6                                   | MGC3310/RNF85                                                                             |
| F09                  | Hs.127799 | NM_001165 | BIRC3     | Baculoviral IAP repeat containing 3                                | AIP1/API2/CIAP2/HAI1/HAI1/MAL2/MIHC/RNF49/c-IAP2                                          |
| F10                  | Hs.75498  | NM_004591 | CCL20     | Chemokine (C-C motif) ligand 20                                    | Ckb4/Exodus/LARC/MIP-3-alpha/MIP-3a/MIP3A/SCYA20/ST38                                     |
| F11                  | Hs.595133 | NM_004233 | CD83      | CD83 molecule                                                      | BL11/HB15                                                                                 |
| F12                  | Hs.75765  | NM_002089 | CXCL2     | Chemokine (C-X-C motif) ligand 2                                   | CINC-2a/GRO2/GROb/MGSA-b/MIP-2a/MIP2/MIP2A/SCYB2                                          |
| G01                  | Hs.89690  | NM_002090 | CXCL3     | Chemokine (C-X-C motif) ligand 3                                   | CINC-2b/GRO3/GROg/MIP-2b/MIP2B/SCYB3                                                      |
| G02                  | Hs.643447 | NM_002091 | ICAM1     | Intercellular adhesion molecule 1                                  | BB2/CD54/IF38                                                                             |
| G03                  | Hs.624    | NM_000584 | CXCL8     | Interleukin 8                                                      | GCP-1/GCP1/IL8/LECTALUCTL/YNAP/MDNCF/MONAP/NAF/NAP-1/NAP1                                 |
| G04                  | Hs.436061 | NM_002198 | IRF1      | Interferon regulatory factor 1                                     | IRF-1/MAR                                                                                 |
| G05                  | Hs.618430 | NM_003998 | NFKB1     | Nuclear factor of kappa light polypeptide gene enhancer 1          | EBP-1/KBF1/NF-kB1/NF-kappa-B/NF-kappaB/NFKB-p105/NFKB-p50/NFKBp105/p50                    |
| G06                  | Hs.81328  | NM_020529 | NFKBIA    | Nuclear factor of kappa light polypeptide gene enhancer 1          | IKBAM/MAD-3/NFKBI                                                                         |
| G07                  | Hs.458276 | NM_004556 | NFKBIE    | Nuclear factor of kappa light polypeptide gene enhancer 1          | IKBE                                                                                      |
| G08                  | Hs.118958 | NM_003764 | STX11     | Syntaxin 11                                                        | FHL4/HLH4/HPLH4                                                                           |
| G09                  | Hs.310640 | NM_052864 | TIFA      | TRAF-interacting protein with forkhead-associated                  | T2BP/T6BP/TIFA                                                                            |
| G10                  | Hs.241570 | NM_000594 | TNF       | Tumor necrosis factor                                              | DIF/TNF-alpha/TNFA/TNFSF2                                                                 |
| G11                  | Hs.525607 | NM_006291 | TNFAIP2   | Tumor necrosis factor, alpha-induced protein 2                     | B94/EXOC3L3                                                                               |
| G12                  | Hs.211600 | NM_006290 | TNFAIP3   | Tumor necrosis factor, alpha-induced protein 3                     | A20/OTUD7C/TNFAIP2                                                                        |
| control genes        |           |           |           |                                                                    |                                                                                           |
| H01                  | Hs.520640 | NM_001101 | ACTB      | Actin, beta                                                        | BRWS1/PS1TP5BP1                                                                           |
| H02                  | Hs.546285 | NM_001002 | RPLP0     | Ribosomal protein, large, P0                                       | L10E/LP0/P/PRLP0/RPPO                                                                     |



|     |        | Up-Down Regulation (comparing to control group: WAS Th1 cells; untransfected) |          |                                        |          |  |  |  |  |  |
|-----|--------|-------------------------------------------------------------------------------|----------|----------------------------------------|----------|--|--|--|--|--|
|     |        | Group 1 ( WAS Th1; wt-WASp transfected)                                       |          | Group 2 (WAS Th1; RNaseH1 transfected) |          |  |  |  |  |  |
|     |        | Fold Regulation                                                               | Comments | Fold Regulation                        | Comments |  |  |  |  |  |
| A01 | AGT    | 96.687                                                                        | A        | 70.2779                                | A        |  |  |  |  |  |
| A02 | AKT1   | 23.9798                                                                       |          | 22.8227                                |          |  |  |  |  |  |
| A03 | ATF1   | 34.2148                                                                       |          | 21.8885                                |          |  |  |  |  |  |
| A04 | BCL2A1 | 47.5393                                                                       |          | 38.245                                 |          |  |  |  |  |  |
| A05 | BCL2L1 | -1.1013                                                                       |          | -1.7589                                |          |  |  |  |  |  |
| A06 | BCL3   | 14.0194                                                                       |          | 10.8521                                |          |  |  |  |  |  |
| A07 | BIRC2  | 26.2264                                                                       |          | 14.998                                 |          |  |  |  |  |  |
| A08 | CARD11 | 9.8468                                                                        |          | 8.6231                                 |          |  |  |  |  |  |
| A09 | CASP1  | 92.8835                                                                       |          | 57.6081                                |          |  |  |  |  |  |
| A10 | CASP8  | 13.0697                                                                       |          | 9.8485                                 |          |  |  |  |  |  |
| A11 | CCL2   | -1.4907                                                                       |          | -17.5366                               |          |  |  |  |  |  |
| A12 | CCL5   | 3.2151                                                                        |          | 2.5394                                 |          |  |  |  |  |  |
| B01 | CD40   | 3.2523                                                                        |          | 2.3953                                 |          |  |  |  |  |  |
| B02 | CFLAR  | 4.9814                                                                        |          | 5.0312                                 |          |  |  |  |  |  |
| B03 | CHUK   | 26.241                                                                        |          | 17.8704                                |          |  |  |  |  |  |
| B04 | CSF1   | 4.3962                                                                        |          | 2.9506                                 |          |  |  |  |  |  |
| B05 | CSF2   | -51.9824                                                                      |          | -77.1396                               |          |  |  |  |  |  |
| B06 | CSF3   | 1993.8622                                                                     | A        | 30.19                                  | A        |  |  |  |  |  |
| B07 | EGFR   | 63.2218                                                                       | A        | 64.2712                                | A        |  |  |  |  |  |
| B08 | EGR1   | 2.2583                                                                        |          | -1.0898                                |          |  |  |  |  |  |
| B09 | ELK1   | 10.1877                                                                       |          | 4.9157                                 |          |  |  |  |  |  |
| B10 | FADD   | 34.5724                                                                       |          | 22.4229                                |          |  |  |  |  |  |
| B11 | FASLG  | 1157.6232                                                                     | A        | 812.1486                               | A        |  |  |  |  |  |
| B12 | FOS    | 29.0779                                                                       | A        | 20.9576                                | A        |  |  |  |  |  |
| C01 | HMOX1  | 55.5668                                                                       | A        | 43.0965                                | A        |  |  |  |  |  |
| C02 | IFNA1  | 319.318                                                                       | A        | 200.0477                               | A        |  |  |  |  |  |
| C03 | IFNG   | 66.6831                                                                       |          | 50.0258                                |          |  |  |  |  |  |
| C04 | IKBKB  | 4.1654                                                                        |          | 3.6933                                 |          |  |  |  |  |  |
| C05 | IKBKG  | 4.1409                                                                        |          | 2.7123                                 |          |  |  |  |  |  |
| C06 | IL10   | 176.5643                                                                      | A        | 158.9798                               | A        |  |  |  |  |  |
| C07 | IL1A   | 1.6785                                                                        |          | 1.4464                                 |          |  |  |  |  |  |
| C08 | IL1B   | 9.2404                                                                        |          | 4.9509                                 |          |  |  |  |  |  |
| C09 | IL1R1  | 66.8729                                                                       | A        | 56.9293                                | A        |  |  |  |  |  |
| C10 | IRAK1  | 9.3544                                                                        |          | 7.3773                                 |          |  |  |  |  |  |
| C11 | IRAK2  | 8.6984                                                                        |          | 7.4071                                 |          |  |  |  |  |  |
| C12 | JUN    | 5.257                                                                         |          | 2.7566                                 |          |  |  |  |  |  |
| D01 | LTA    | 3.0023                                                                        |          | 1.9592                                 |          |  |  |  |  |  |
| D02 | LTBR   | 13.6285                                                                       |          | 11.0678                                |          |  |  |  |  |  |
| D03 | MALT1  | 91.8845                                                                       |          | 66.6947                                |          |  |  |  |  |  |
| D04 | MAP3K1 | 61.0809                                                                       | A        | 29.3645                                | A        |  |  |  |  |  |
| D05 | MYD88  | 23.8538                                                                       |          | 13.6876                                |          |  |  |  |  |  |
| D06 | NFKB2  | 3.2566                                                                        |          | 2.8499                                 |          |  |  |  |  |  |
| D07 | NOD1   | 21.4789                                                                       |          | 16.2864                                |          |  |  |  |  |  |
| D08 | PSIP1  | 28.6358                                                                       |          | 21.9067                                |          |  |  |  |  |  |
| D09 | RAF1   | 6.6587                                                                        |          | 5.0037                                 |          |  |  |  |  |  |
| D10 | REL    | 5.6889                                                                        |          | 5.0169                                 |          |  |  |  |  |  |
| D11 | RELA   | 7.8112                                                                        |          | 5.8417                                 |          |  |  |  |  |  |
| D12 | RELB   | 25.7099                                                                       |          | 15.1737                                |          |  |  |  |  |  |
| E01 | RHOA   | 24.3078                                                                       |          | 14.2126                                |          |  |  |  |  |  |
| E02 | RIPK1  | 9.0678                                                                        |          | 4.2416                                 |          |  |  |  |  |  |



|                                                                                                                                                                                                                                                    |  |  |  |  |  |  |
|----------------------------------------------------------------------------------------------------------------------------------------------------------------------------------------------------------------------------------------------------|--|--|--|--|--|--|
| the other sample suggesting that the actual fold-change value is at least as large as the calculated and reported fold-change result.                                                                                                              |  |  |  |  |  |  |
| This fold-change result may also have greater variations if p value > 0.05; therefore, it is important to have a sufficient number of biological replicates to validate the result for this gene.                                                  |  |  |  |  |  |  |
| B: This gene's average threshold cycle is relatively high (> 30), meaning that its relative expression level is low, in both control and test samples, and the p-value for the fold-change is either unavailable or relatively high (p > 0.05).    |  |  |  |  |  |  |
| This fold-change result may also have greater variations; therefore, it is important to have a sufficient number of biological replicates to validate the result for this gene.                                                                    |  |  |  |  |  |  |
| C: This gene's average threshold cycle is either not determined or greater than the defined cut-off value (default 35), in both samples meaning that its expression was undetected, making this fold-change result erroneous and un-interpretable. |  |  |  |  |  |  |
|                                                                                                                                                                                                                                                    |  |  |  |  |  |  |
| <b>Fold Change &amp; Fold Regulation:</b>                                                                                                                                                                                                          |  |  |  |  |  |  |
| Fold-Change ( $2^{-(\Delta\Delta Ct)}$ ) is the normalized gene expression ( $2^{-(\Delta Ct)}$ ) in the Test Sample divided the normalized gene expression ( $2^{-(\Delta Ct)}$ ) in the Control Sample.                                          |  |  |  |  |  |  |
| Fold-Regulation represents fold-change results in a biologically meaningful way. Fold-change values greater than one indicate a positive- or an up-regulation, and the fold-regulation is equal to the fold-change.                                |  |  |  |  |  |  |
| Fold-change values less than one indicate a negative or down-regulation, and the fold-regulation is the negative inverse of the fold-change.                                                                                                       |  |  |  |  |  |  |
| Fold-change and fold-regulation values greater than 2 are indicated in red; fold-change values less than 0.5 and fold-regulation values less than -2 are indicated in blue.                                                                        |  |  |  |  |  |  |
|                                                                                                                                                                                                                                                    |  |  |  |  |  |  |
|                                                                                                                                                                                                                                                    |  |  |  |  |  |  |
|                                                                                                                                                                                                                                                    |  |  |  |  |  |  |



**Up-Down Regulation (comparing to control group: Normal Th1 cells)**

|     |        | Group 1 (WAS Th1, untransfected) |          | Group 2 (WAS Th1, wt-WASp transfected) |          | Group 3 (WAS Th1, RNaseH1 transfected) |          |
|-----|--------|----------------------------------|----------|----------------------------------------|----------|----------------------------------------|----------|
|     |        | Fold Regulation                  | Comments | Fold Regulation                        | Comments | Fold Regulation                        | Comments |
| A01 | AGT    | -211.6079                        | A        | -2.1886                                |          | -3.011                                 |          |
| A02 | AKT1   | -60.286                          |          | -2.514                                 |          | -2.6415                                |          |
| A03 | ATF1   | -69.8675                         |          | -2.042                                 |          | -3.192                                 |          |
| A04 | BCL2A1 | -59.7576                         |          | -1.257                                 |          | -1.5625                                |          |
| A05 | BCL2L1 | -1.9463                          |          | -2.1435                                |          | -3.4234                                |          |
| A06 | BCL3   | -31.1109                         |          | -2.2191                                |          | -2.8668                                |          |
| A07 | BIRC2  | -56.6086                         |          | -2.1585                                |          | -3.7744                                |          |
| A08 | CARD11 | -21.2538                         |          | -2.1585                                |          | -2.4648                                |          |
| A09 | CASP1  | -161.7195                        |          | -1.7411                                |          | -2.8072                                |          |
| A10 | CASP8  | -26.3211                         |          | -2.0139                                |          | -2.6726                                |          |
| A11 | CCL2   | -1.2605                          |          | -1.879                                 |          | -22.1058                               |          |
| A12 | CCL5   | -7.5415                          |          | -2.3457                                |          | -2.9698                                |          |
| B01 | CD40   | -4.4427                          |          | -1.366                                 |          | -1.8548                                |          |
| B02 | CFLAR  | -7.709                           |          | -1.5476                                |          | -1.5322                                |          |
| B03 | CHUK   | -49.9963                         |          | -1.9053                                |          | -2.7977                                |          |
| B04 | CSF1   | -2.094                           |          | 2.0994                                 |          | 1.4091                                 |          |
| B05 | CSF2   | 23.9168                          |          | -2.1735                                |          | -3.2253                                |          |
| B06 | CSF3   | -4244.415                        | A        | -2.1287                                |          | -140.59                                |          |
| B07 | EGFR   | -112.3885                        | A        | -1.7777                                |          | -1.7487                                |          |
| B08 | EGR1   | -3.7199                          |          | -1.6472                                |          | -4.054                                 |          |
| B09 | ELK1   | -16.665                          |          | -1.6358                                |          | -3.3902                                |          |
| B10 | FADD   | -66.7895                         |          | -1.9319                                |          | -2.9786                                |          |
| B11 | FASLG  | -1987.7905                       | A        | -1.7171                                |          | -2.4476                                |          |
| B12 | FOS    | -44.6891                         | A        | -1.5369                                |          | -2.1324                                |          |
| C01 | HMOX1  | -84.2234                         | A        | -1.5157                                |          | -1.9543                                |          |
| C02 | IFNA1  | -738.7027                        | A        | -2.3134                                |          | -3.6926                                |          |
| C03 | IFNG   | -103.1965                        |          | -1.5476                                |          | -2.0629                                |          |
| C04 | IKBKB  | -6.3575                          |          | -1.5263                                |          | -1.7214                                |          |
| C05 | IKBKG  | -6.9161                          |          | -1.6702                                |          | -2.5499                                |          |
| C06 | IL10   | -286.8296                        | A        | -1.6245                                |          | -1.8042                                |          |
| C07 | IL1A   | -3.3338                          |          | -1.9862                                |          | -2.3048                                |          |
| C08 | IL1B   | -19.0003                         |          | -2.0562                                |          | -3.8377                                |          |
| C09 | IL1R1  | -103.4902                        | A        | -1.5476                                |          | -1.8179                                |          |
| C10 | IRAK1  | -12.7785                         |          | -1.366                                 |          | -1.7321                                |          |
| C11 | IRAK2  | -19.9837                         |          | -2.2974                                |          | -2.6979                                |          |
| C12 | JUN    | -8.9647                          |          | -1.7053                                |          | -3.2521                                |          |
| D01 | LTA    | -6.2595                          |          | -2.0849                                |          | -3.1949                                |          |
| D02 | LTBR   | -20.5142                         |          | -1.5052                                |          | -1.8535                                |          |
| D03 | MALT1  | -195.5983                        |          | -2.1287                                |          | -2.9327                                |          |
| D04 | MAP3K1 | -92.5814                         | A        | -1.5157                                |          | -3.1528                                |          |
| D05 | MYD88  | -54.4232                         |          | -2.2815                                |          | -3.9761                                |          |
| D06 | NFKB2  | -5.0748                          |          | -1.5583                                |          | -1.7807                                |          |
| D07 | NOD1   | -30.7998                         |          | -1.434                                 |          | -1.8911                                |          |
| D08 | PSIP1  | -48.1595                         |          | -1.6818                                |          | -2.1984                                |          |
| D09 | RAF1   | -10.0928                         |          | -1.5157                                |          | -2.0171                                |          |
| D10 | REL    | -9.7011                          |          | -1.7053                                |          | -1.9337                                |          |
| D11 | RELA   | -11.7578                         |          | -1.5052                                |          | -2.0127                                |          |
| D12 | RELB   | -35.8587                         |          | -1.3947                                |          | -2.3632                                |          |
| E01 | RHOA   | -48.9538                         |          | -2.0139                                |          | -3.4444                                |          |
| E02 | RIPK1  | -13.0932                         |          | -1.4439                                |          | -3.0869                                |          |
| E03 | STAT1  | -48.673                          |          | -1.9453                                |          | -2.6223                                |          |
| E04 | TBK1   | -18.6765                         |          | -1.8277                                |          | -2.9376                                |          |
| E05 | TICAM1 | -6.4123                          |          | -1.6472                                |          | -1.7936                                |          |
| E06 | TIMP1  | -15.2121                         |          | -1.6472                                |          | -5.8574                                |          |
| E07 | TLR1   | -418.6353                        | A        | -1.5263                                |          | -11.3086                               |          |
| E08 | TLR2   | -126.5751                        | A        | -1.4044                                |          | -2.433                                 |          |
| E09 | TLR3   | -18.2086                         |          | -1.5692                                |          | -3.1161                                |          |
| E10 | TLR4   | -10.4857                         |          | -1.5369                                |          | -2.8158                                |          |

|     |           |           |   |         |         |
|-----|-----------|-----------|---|---------|---------|
| E11 | TLR6      | -123.7127 | A | -1.5369 | -2.399  |
| E12 | TLR9      | -12.2469  |   | -1.4044 | -1.9319 |
| F01 | TNFRSF10A | -3.83     |   | -1.3472 | -1.4169 |
| F02 | TNFRSF10B | -1.8174   |   | -1.6472 | -2.7178 |
| F03 | TNFRSF1A  | -22.1042  |   | -1.7777 | -2.4874 |
| F04 | TNFSF10   | -2.9576   |   | -1.3287 | -1.4079 |
| F05 | TRADD     | -29.2964  |   | -1.5052 | -3.4384 |
| F06 | TRAF2     | -3.5693   |   | -1.5052 | -1.6123 |
| F07 | TRAF3     | -7.4464   |   | -1.4641 | -2.063  |
| F08 | TRAF6     | -8.9176   |   | -1.5157 | -1.837  |
| F09 | BIRC3     | -4.8001   |   | -1.8921 | -2.6267 |
| F10 | CCL20     | -2.8028   |   | -1.6021 | -1.6423 |
| F11 | CD83      | 1.0385    |   | -1.7532 | -2.5063 |
| F12 | CXCL2     | -3.1146   |   | -1.5476 | -2.6234 |
| G01 | CXCL3     | -76.8914  | A | -1.7777 | -3.4587 |
| G02 | ICAM1     | 1.9175    |   | -1.8277 | -1.8588 |
| G03 | CXCL8     | -3.5842   |   | -1.8532 | -2.1755 |
| G04 | IRF1      | -4.2692   |   | -1.6472 | -1.8678 |
| G05 | NFKB1     | -5.0028   |   | -1.6702 | -2.3912 |
| G06 | NFKBIA    | -1.7936   |   | -1.6702 | -2.1141 |
| G07 | NFKBIE    | -12.8978  |   | -1.6586 | -1.9713 |
| G08 | STX11     | -14.5067  |   | -1.4241 | -2.1369 |
| G09 | TIFA      | -98.6228  |   | -1.2924 | -2.8358 |
| G10 | TNF       | -2.4761   |   | -1.6472 | -2.2025 |
| G11 | TNFAIP2   | 9.9704    |   | -1.8025 | -2.1834 |
| G12 | TNFAIP3   | -3.2055   |   | -1.6586 | -2.1512 |

control genes

|     |       |         |  |         |        |
|-----|-------|---------|--|---------|--------|
| H01 | ACTB  | -1.0203 |  | 1.6586  | 1.732  |
| H02 | RPLP0 | 1.0203  |  | -1.6586 | -1.732 |

**Comments:**

A: This gene's average threshold cycle is relatively high (> 30) in either the control or the test sample, and is reasonably low in the other sample (< 30).

These data mean that the gene's expression is relatively low in one sample and reasonably detected in the other sample suggesting that the actual fold-change value is at least as large as the calculated and reported fold-change result.

This fold-change result may also have greater variations if p value > 0.05; therefore, it is important to have a sufficient number of biological replicates to validate the result for this gene.

B: This gene's average threshold cycle is relatively high (> 30), meaning that its relative expression level is low, in both control and test samples, and the p-value for the fold-change is either unavailable or relatively high (p > 0.05).

This fold-change result may also have greater variations; therefore, it is important to have a sufficient number of biological replicates to validate the result for this gene.

C: This gene's average threshold cycle is either not determined or greater than the defined cut-off value (default 35), in both samples meaning that its expression was undetected, making this fold-change result erroneous and un-interpretable.

**Fold Change & Fold Regulation:**

Fold-Change ( $2^{\Delta\Delta Ct}$ ) is the normalized gene expression ( $2^{\Delta Ct}$ ) in the Test Sample divided the normalized gene expression ( $2^{\Delta Ct}$ ) in the Control Sample.

Fold-Regulation represents fold-change results in a biologically meaningful way. Fold-change values greater than one indicate a positive- or an up-regulation, and the fold-regulation is equal to the fold-change.

Fold-change values less than one indicate a negative or down-regulation, and the fold-regulation is the negative inverse of the fold-change.

Fold-change and fold-regulation values greater than 2 are indicated in red; fold-change values less than 0.5 and fold-regulation values less than -2 are indicated in blue.

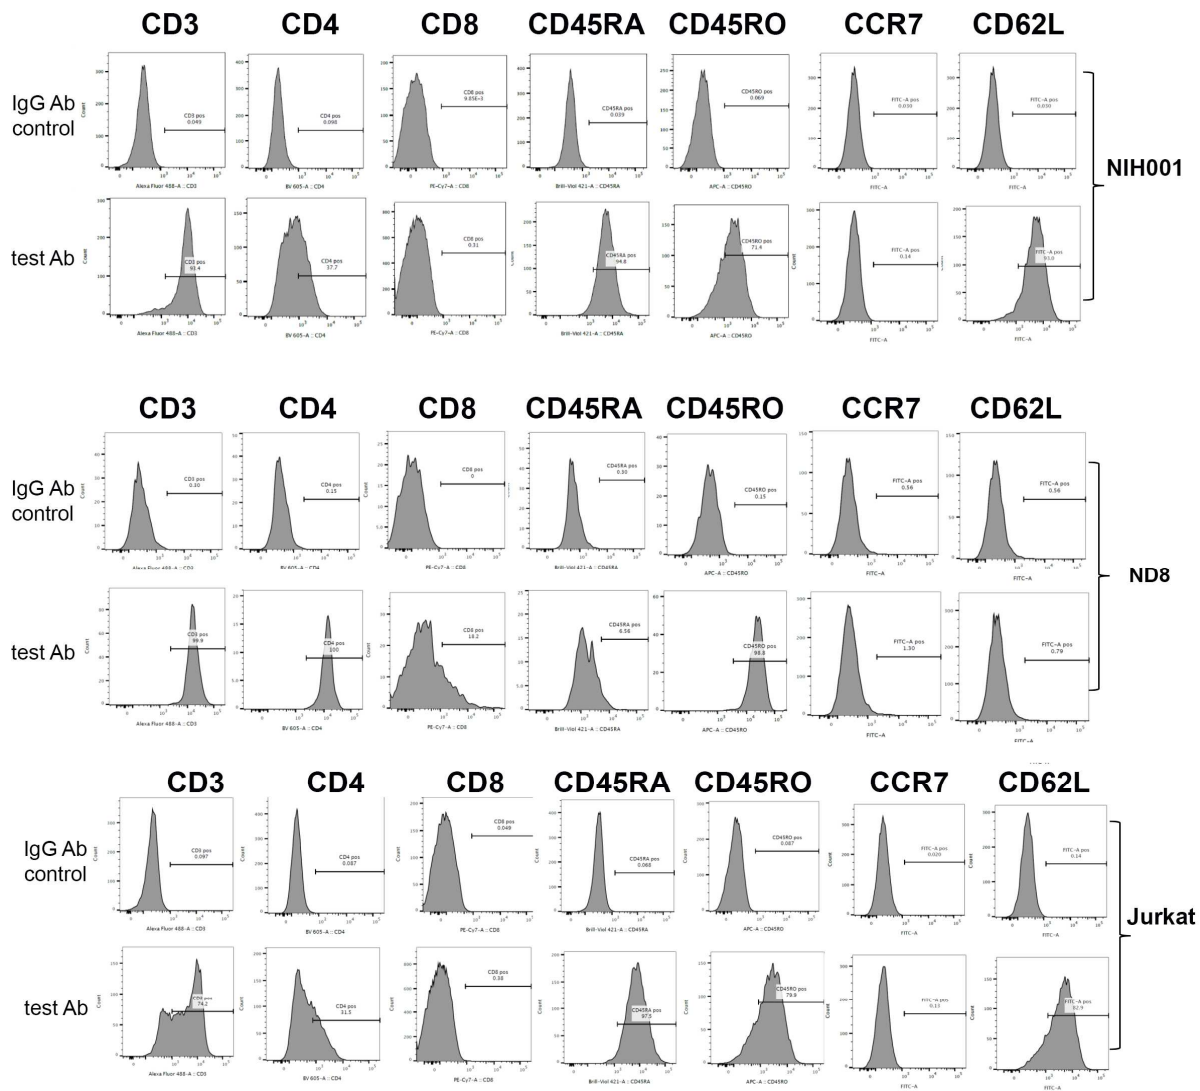

|                 | CD3 | CD4 | CD8 | CD45RA | CD45RO | CCR7 | CD62L | <i>Th subtype</i>                                                 |
|-----------------|-----|-----|-----|--------|--------|------|-------|-------------------------------------------------------------------|
| <b>NIH001</b>   | +   | +   | -   | +      | +      | -    | +     | <b>Effector cell</b> (not naïve or central memory cell)           |
| <b>Milan008</b> | +   | +   | -   | -      | +      | -    | -     | <b>Effector memory cell</b><br>(not naïve or central memory cell) |
| <b>Jurkat</b>   | +   | +   | -   | +      | +      | -    | +     | <b>Effector cell</b> (not naïve or central memory cell)           |

## Generation of CRISPR/Cas9-mediated WAS KO Th cell line (NIH001)

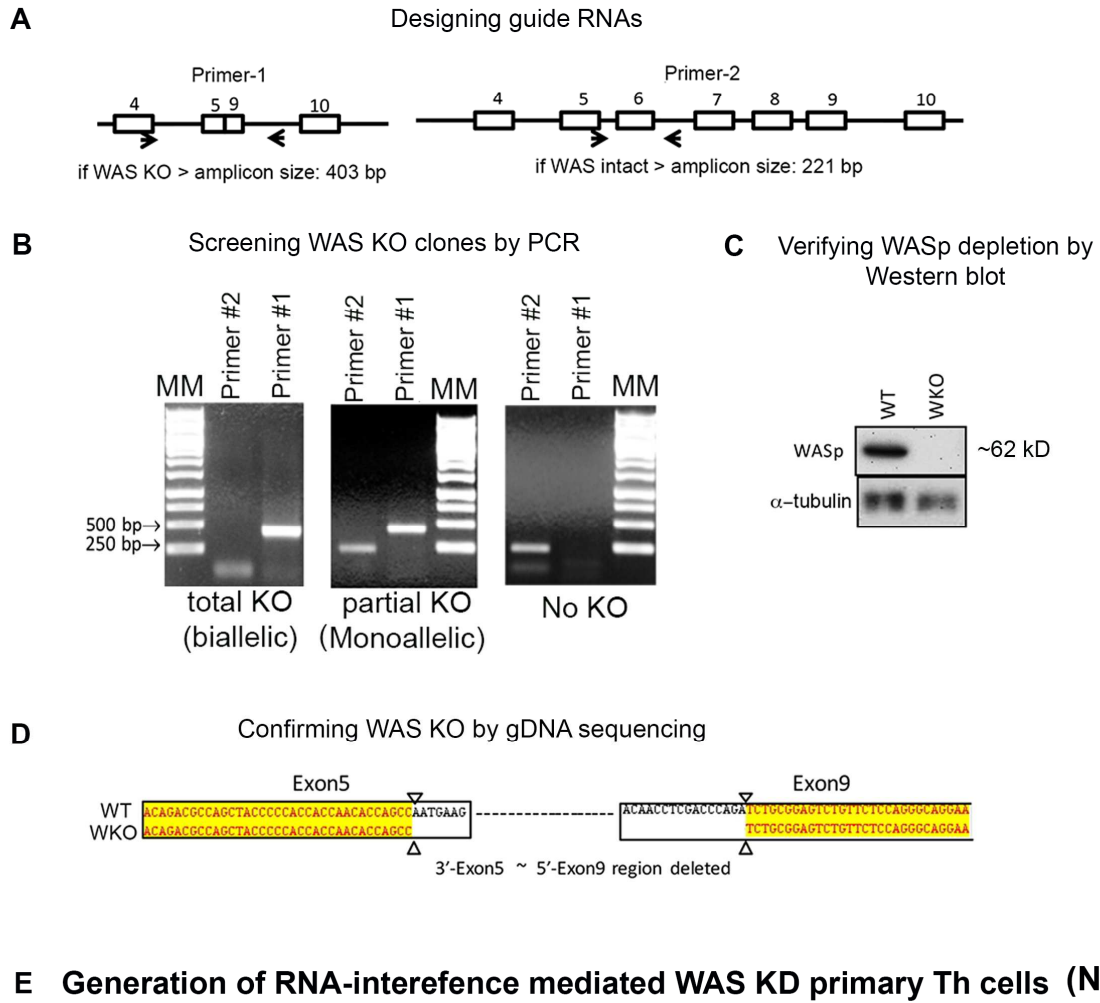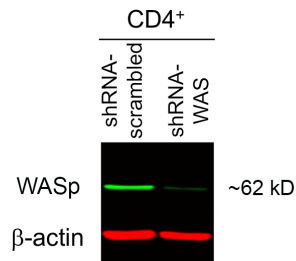

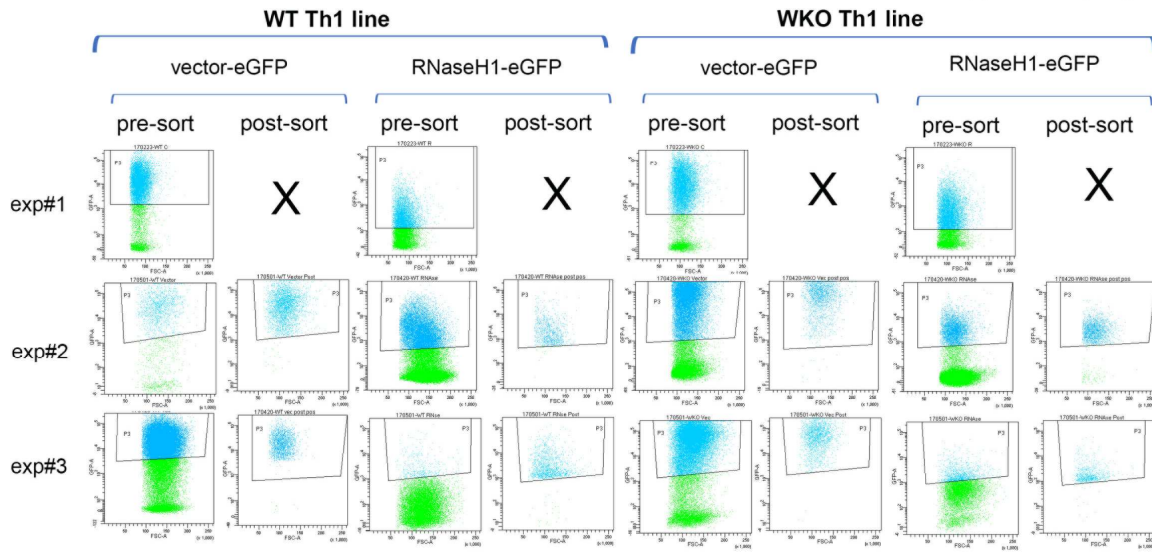

**Confocal imaging**

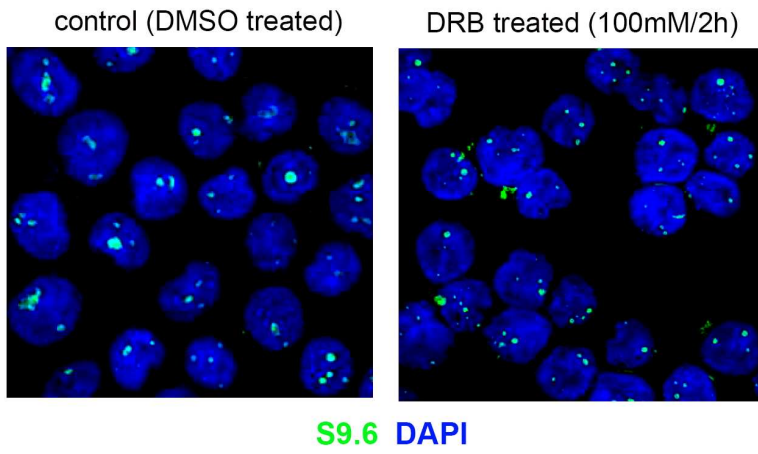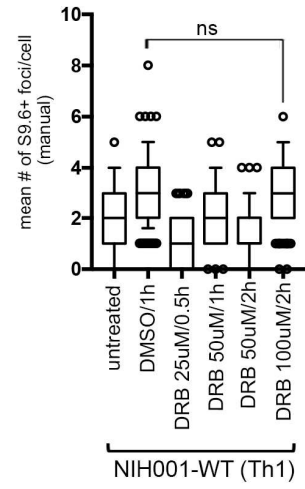

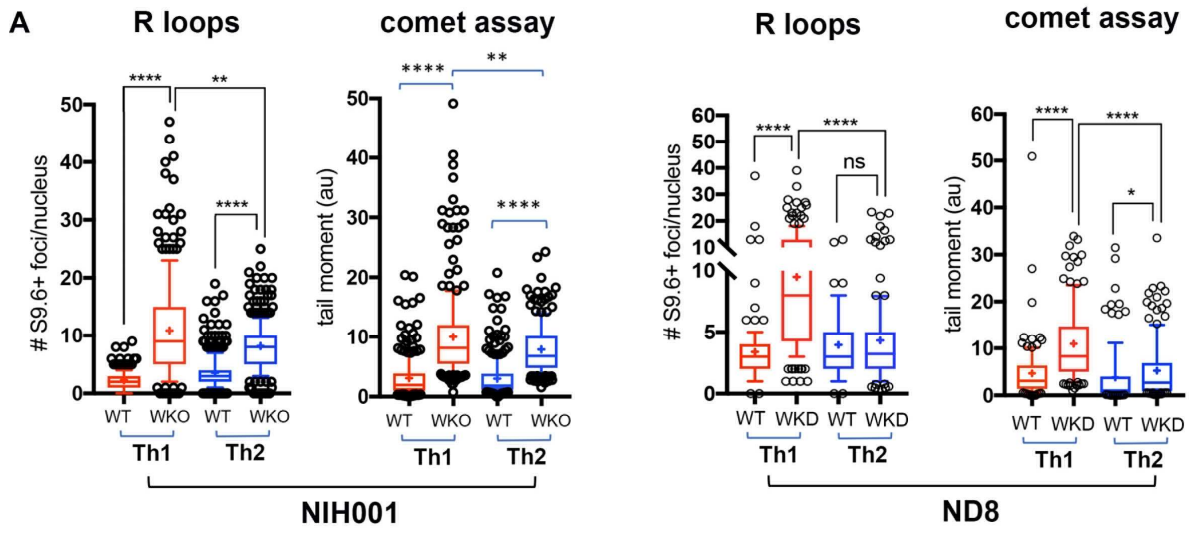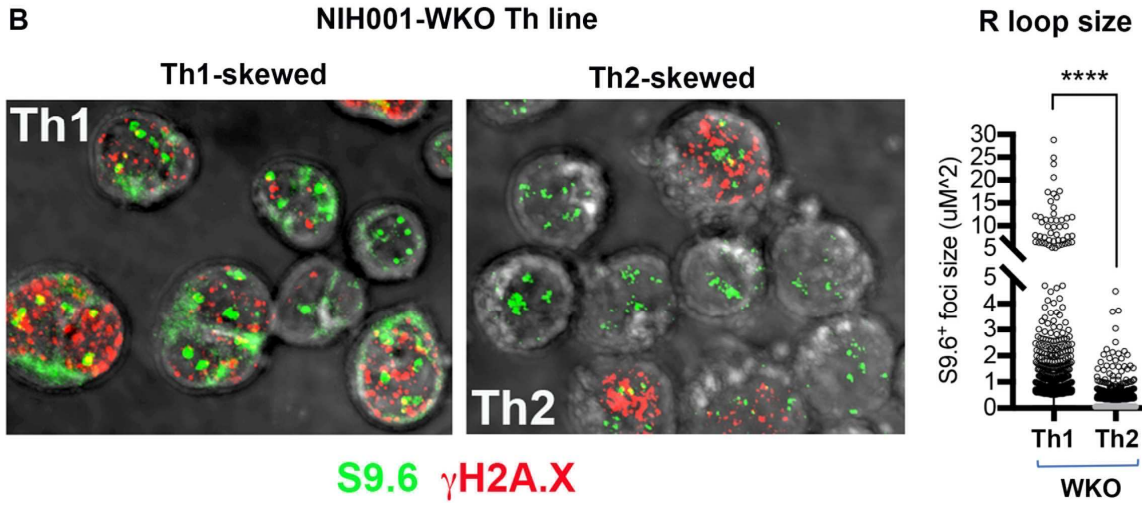



Supplementary Figure-6

DRIP/ChIP-qPCR: 3' end of genes

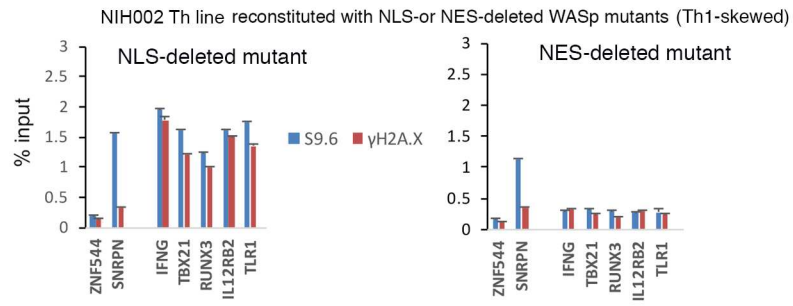

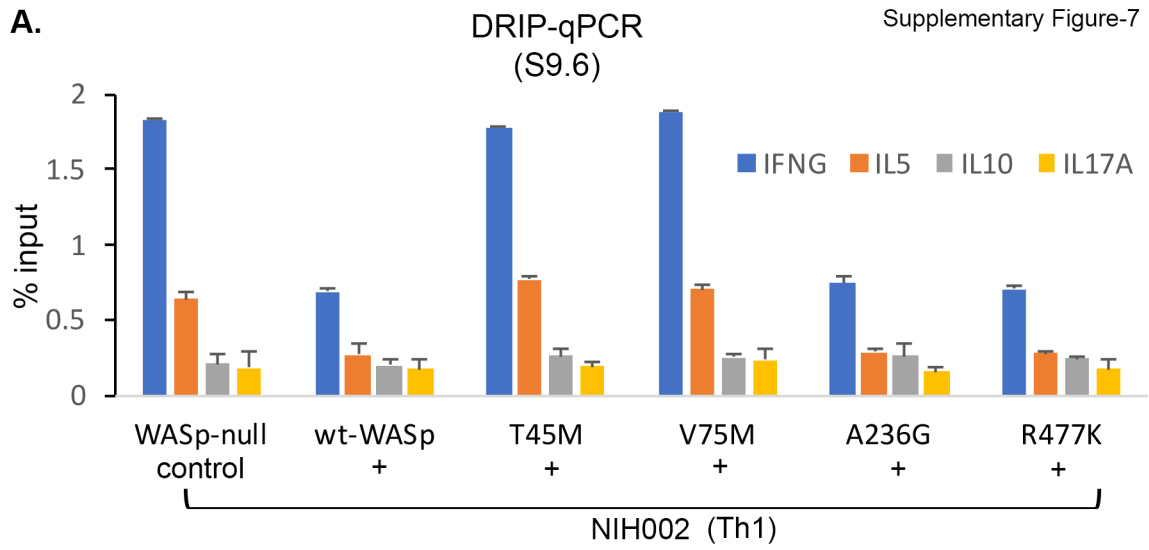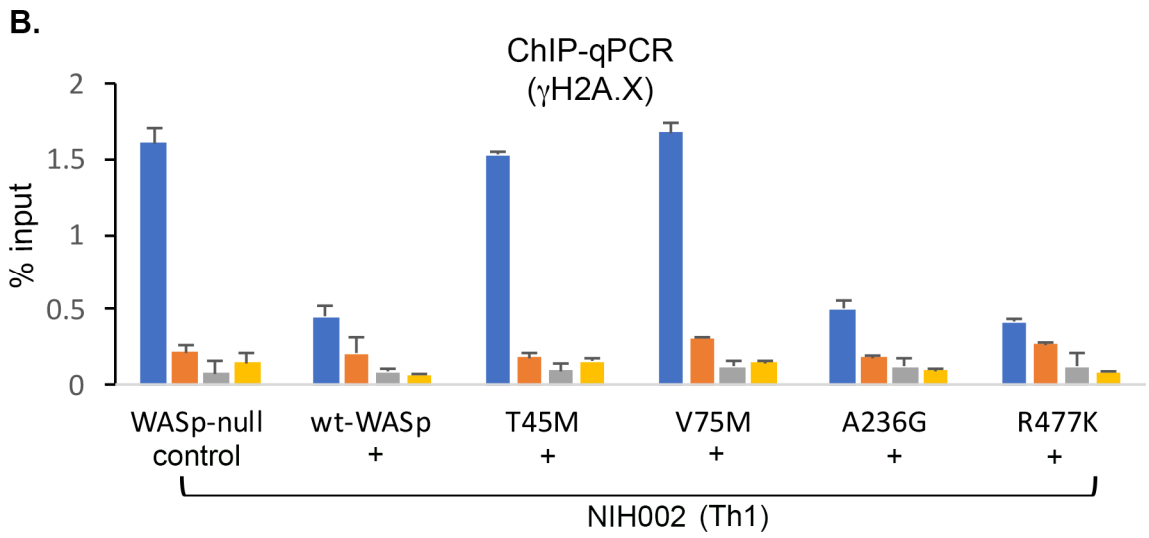

Supplement: NIHMS927898-supplement-supplement_1.pdf [file NIHMS927898-supplement-supplement_1.pdf]
